# Supplementary material for: Treating a type 2 diabetic patient with impaired pancreatic islet function by personalized endoderm stem cell-derived islet tissue
Source: PubMed Central journal article supplement (PMC11058776; doi:10.1038/s41421-024-00662-3), 2024-04-30
Supplement: 41421_2024_662_MOESM1_ESM.pdf [file 41421_2024_662_MOESM1_ESM.pdf]

# Treating a type 2 diabetic patient with impaired pancreatic islet function by personalized endoderm stem cell-derived islet tissue

Jiaying Wu, Tuo Li, Meng Guo, Junsong Ji, Xiaoxi Meng, Tianlong Fu, Tengfei Nie, Tongkun Wei, Ying Zhou, Weihua Dong, Ming Zhang, Yongquan Shi, Xin Cheng, Hao Yin and Clinical Group

## Table of contents

|                                                                                                                |           |
|----------------------------------------------------------------------------------------------------------------|-----------|
| <b>Supplementary Methods</b> .....                                                                             | <b>3</b>  |
| Study oversight .....                                                                                          | 3         |
| Experimental resources.....                                                                                    | 6         |
| Method details.....                                                                                            | 7         |
| Quality control methods.....                                                                                   | 9         |
| Animal studies .....                                                                                           | 12        |
| Clinical studies.....                                                                                          | 15        |
| <b>Supplementary Fig. S1. Quality control of EnSCs</b> .....                                                   | <b>17</b> |
| <b>Supplementary Fig. S2. Quality control of intermediate pancreatic differentiation stages of EnSCs</b> ..... | <b>19</b> |
| <b>Supplementary Fig. S3. Quality control of E-islets</b> .....                                                | <b>22</b> |
| <b>Supplementary Fig. S4. E-islets ameliorate diabetes in STZ-induced diabetic monkeys</b>                     | <b>23</b> |
| <b>Supplementary Fig. S5. Characterization of humanized mice</b> .....                                         | <b>26</b> |
| <b>Supplementary Fig. S6. Clinical assessments and outcomes of glycemic control</b> .....                      | <b>27</b> |
| <b>Supplementary Fig. S7. Continuous glucose monitoring at various follow-up time points</b> .....             | <b>30</b> |
| <b>Supplementary Table Information</b> .....                                                                   | <b>31</b> |
| <b>Supplementary Table S1. Exploratory objectives</b> .....                                                    | <b>31</b> |
| <b>Supplementary Table S2. Summary of SNV discovered from whole genome sequencing of</b>                       |           |

|                                                                                             |           |
|---------------------------------------------------------------------------------------------|-----------|
| <b>EnSCs compared to parental PBMCs.....</b>                                                | <b>32</b> |
| <b>Supplementary Table S3. Teratoma formation assay .....</b>                               | <b>37</b> |
| <b>Supplementary Table S4. Key laboratory values before and after transplantation .....</b> | <b>38</b> |
| <b>Supplementary Table S5. Primary follow-up objectives .....</b>                           | <b>39</b> |
| <b>Supplementary Table S6. Quality control release criteria of EnSCs and E-islets .....</b> | <b>40</b> |
| <b>Supplementary Table S7. Primer list .....</b>                                            | <b>42</b> |
| <b>Supplementary Table S8. Antibody list .....</b>                                          | <b>42</b> |

## **Supplementary Methods**

### **Study oversight**

This is pilot study of an investigator-initiated trial (ClinicalTrials.gov (NCT05294822)) designed to investigate the safety and efficacy of E-islets generated from autologous EnSCs for the treatment of insulin-dependent diabetic patients with impaired islet function (Fig. 1a). Informed consent included a review of available therapeutic options and a list of potential risks associated with the first-in-human use of this method. The study was approved by the ethics committee of Shanghai Changzheng Hospital [CZEC(2019)-03] and conducted under regulatory guidance from the National Medical Products Administration (NMPA) and National Health Committee (NHC) (Administrative Measures for Clinical Research of Stem Cells (Trial), Quality Control of Stem Cell Preparations and Guiding Principles of Preclinical Research (Trial) and Measures for the Administration of Clinical Research Initiated by Investigators in Medical and Health Institutions). Written informed consent was obtained from participant before enrollment. All animal procedures were conducted with approval from the CAS Center for Excellence in Molecular Cell Science, Chinese Academy of Sciences. All the authors vouch for the accuracy and completeness of the data reported and the adherence of the study to the protocol, which are available with the full text of this article.

### **Creation of autologous EnSC**

PBMCs were harvested, tested for microorganisms and used to generate iPSC lines under GMP conditions. Two iPSC clones were selected for further characterization and establishment of EnSC lines (modified from reference # 12) under GMP conditions (Supplementary Fig. S1). Whole-genome sequencing (WGS) was performed on EnSC lines to confirm the absence of newly emerged cancer or diabetes-associated mutations that were not detected in the original source PBMCs (Supplementary Fig. S1 and Supplementary Table S2). EnSCs and their derivatives were tested in immunocompromised mice (SCID Beige) for tumor-forming potential for 6 months (Supplementary Table S3).

### **Characterization of islets derived from EnSCs**

Three batches of E-islets were generated through two intermediate (pancreatic progenitor / PP and endocrine progenitor / EP) stages under GMP conditions at scales that met the dose requirement for each patient ( $1.2 \times 10^6$  islet equivalents [IEQs] / patient). The EnSC-derived PPs, EPs and E-islets were evaluated for microorganism contamination, morphology, purity and viability. E-islets were analyzed for endocrine cell composition (Insulin+NKX6-1+  $\beta$  cells; Glucagon+  $\alpha$  cells; Somatostatin+  $\delta$  cells; Chromogranin A+ endocrine cells) by flow cytometry and single-cell transcriptomic analyses (scRNA-seq). The in vitro functionality of E-islets was assayed by glucose-stimulated insulin secretion (GSIS) as human cadaveric islets, and the in vivo functionality was evaluated by kidney capsule or hepatic portal transplantation into the streptozotocin-induced diabetic mouse or monkey models. The nontarget hepatocytes (HNF4A+Albumin+), cholangiocytes (SOX9+CK7+), intestinal epithelial cells (CDX2+) and the pancreatic ductal cells (SOX9+PTF1A+PDX1+) were estimated from the scRNA-seq data.

### **Safety monitoring**

Safety endpoints included treatment-emergent adverse events (TEAEs), early discontinuation of treatment due to adverse events and adjudicated adverse events. The tumor formation was monitored every three months by enhanced magnetic resonance imaging performed on upper abdomen and by measurements of serum cancer-related antigens.

### **Assessments of clinical outcomes**

At designated visits, the patient was weighed and reported his Clark hypoglycemia awareness score, and was subjected to routine and disease-specific assessments. Examinations of endocrine function and diabetes-specific parameters by mixed-meal tolerance tests (MMTT) were performed at baseline and at 4, 8, 12, 16, 20, and 24 weeks and thereafter every 12 weeks (Supplementary Fig. S6a). The glycemic control

of the patient was measured with a 24-hour real-time blood glucose monitoring system (Medtronic Guardian™ Connect Subcutaneous Continuous Glucose Monitoring System/CGMS). All information from the CGMS device was centrally assessed. The baseline and follow-up CGM glucose values were measured throughout the first 52 weeks, and the mean duration of CGM device wearing was at least 3 days.

As the three major clinical outcomes, the glycemic targets, the levels of fasting and meal-stimulated circulating C-peptide/insulin and the reduction of exogenous insulin were monitored throughout the first 116 weeks. A list of follow-up assessments is provided in Supplementary Tables S4 and S5.

### **Case report**

The patient was a 59-year-old man with a 25-year history of T2D who developed end-stage diabetic nephropathy and underwent kidney transplantation in June of 2017. His estimated glomerular filtration rate (eGFR) and serum creatinine (SCr) level were maintained at 90 to 105 ml/(min·1.73 cm<sup>2</sup>) and 45-72 μmol/L, respectively, indicating good survival and functioning of the donor organ. He had been receiving anti-rejection drugs (tacrolimus 1 mg bid and mycophenolate mofetil 0.5 mg bid) and subcutaneous insulin injection at a dose of 20 U once daily at bedtime and oral antidiabetic medications (acarbose 50 mg tid and metformin 0.75 g bid) (Supplementary Fig. S6a). However, he reported poor glycemic control since November 2019, characterized by an average blood glucose level of 7.8 ± 2 mmol/L, the time-in-the-range (TIR, 3.9-10.0 mM) of 87.7% and the time-in-the-tight-target-range (TITR, 3.9-7.8 mM) of 56.7%, with daily hyperglycemic events (> 10.0 mmol/L) of 0.7/d and hypoglycemic events (< 3.9 mmol/L) of 0.3/d. Due to the major concerns of hypoglycemia induced by insulin administration, the adverse effect of antirejection drugs on glycemic control, and the detrimental effect of poor glycemic control on the long-term survival of the donor kidney, the patient and the study team agreed to pursue transplantation with autologous E-islets. The patient underwent a percutaneous transhepatic portal vein transplantation with 1.2 million IEQs delivered, conforming to the regulatory guidance from the clinical islet transplantation registration (CITR). Portal venography and portal vein

pressure were monitored throughout the whole procedure to ensure that there was no portal embolization or portal hypertension. No glucocorticoids were used at any time. After the surgery, the patient was monitored overnight and was allowed out of bed the following day. Patient compliance with scheduled appointments was 100% (some visits were either cancelled or relocated to local hospitals due to the COVID-19 pandemic).

## **Experimental resources**

### **Cell resource of human endoderm stem cell**

Human endoderm stem cell lines were generated from patient-specific hiPSCs and maintained in serum-free and sromal-free conditions. The hiPSCs were generated from human peripheral blood mononuclear cells (PBMCs) of T2D patient with Sendai virus reprogramming kit (Invitrogen) containing four reprogramming factors (*OCT4*, *SOX2*, *KLF4*, *L-MYC*).

### **Human primary islets**

Human primary islets were provided and isolated by Shanghai Changzheng Hospital.

### **Rodent strains**

SCID Beige mice were obtained from Shanghai Lingchang Biotech company. All experiments were performed in accordance with protocols approved by the Institutional Animal Care and Use Committee at Shanghai Institute of Biochemistry and Cell Biology.

NCG-hIL15 mice were obtained from GemPharmatech Co., Ltd.

All animals were males and were housed in individually ventilated cages (IVC) in specific pathogen-free (SPF) animal facility with temperature and light controlled (12-h light/dark cycle).

### **Cynomolgus monkey model**

Cynomolgus monkeys were obtained and housed in WUXI Biologics company. All animals were housed in a separate stainless-steel cage with temperature (18-26 °C),

relative humidity (40-70 %) and light (12-h light/dark cycle) controlled. All animals provided with a continuous water supply and were fed a regular primate diet supplemented with fresh fruits twice daily (9-11 a.m. and 3-4 p.m.). All animal care and handling were performed in accordance with the guidelines established by IACUC at WUXI Biologics company.

## **Method details**

### **Generation of induced pluripotent stem cells (iPSCs) from patient's peripheral blood mononuclear cells (PBMCs)**

PBMCs were harvested and tested for microorganisms, including bacteria, fungi, mycoplasma, HIV, HAV, HBV, HCV, HTLV, EBV, HCMV and TP, and then used to generate iPSC lines with the Sendai Viral reprogramming system under GMP conditions. PBMCs of T2D patient (WB) were isolated from whole blood using Ficoll gradient. The whole blood was sampled with BD Vacutainer® EDTA Tubes. The blood was diluted with DPBS and poured onto the Ficoll solution, and were centrifuged for 30 minutes at 400 g at room temperature. The layer of PBMCs was collected and washed with DPBS. PBMCs were frozen or proceeded to iPSC generation. Sendai virus reprogramming kit (Invitrogen, GMP grade) containing four reprogramming factors (*OCT4*, *SOX2*, *KLF4*, *L-MYC*) was used for iPSC generation. Two million PBMCs were first cultured in the presence of human SCF, FLT-3, IL-3 and IL-6 in SP34 for 7 days as instructed. On the day of transduction, PBMCs were washed and counted, and the appropriate volumes of virus vectors were calculated according to the cell count and the titers of virus. The PBMCs and virus vectors were mixed for the transduction. Two days post transduction, cells were plated onto culture dishes and gradually transitioning cells to mTeSR1 medium in the next 7 days. iPSC colonies were picked and transferred onto individual culture plates around 2-3 weeks, and were maintained in a 37°C incubator with a 5% CO<sub>2</sub>, 5% O<sub>2</sub>, 90% N<sub>2</sub> environment. Ten iPSC clones at Passage 10 were tests for in vitro differentiation potential, and two of them (designated WB20 and WB34) were selected for further characterization and the establishment of EnSC lines under GMP conditions.

### **Generation of EnSCs from hiPSCs**

EnSC lines were established from patient-specific hiPSC lines WB20 and WB34, and maintained in a 37°C incubator with a 5% CO<sub>2</sub>, 5% O<sub>2</sub>, 90% N<sub>2</sub> environment. Endodermal cells were differentiated from hiPSCs by dual activation of Nodal and WNT signaling pathways with Activin A (100 ng/mL) and CHIR99021 (2 μM) for 24 hours, and then cultured in the presence of bFGF (5 ng/mL), Activin A (100 ng/mL), VEGF (10 ng/mL) ascorbic acid (0.5 mM, Wako) and glutaMAX (2 mM, Invitrogen) for 4 days, followed by the culturing in the presence of bFGF (10 ng/ml), TGF-α (20 ng/mL), VEGF (10 ng/mL), BMP4 (50 ng/mL), HGF (25 ng/mL), dexamethasone (40 ng/mL, Sigma) for 4 days. Thereafter EnSCs were established by replating endodermal cells at 1x10<sup>6</sup> cells per milliliter and maintaining in MCDB131 supplemented with Wnt3A (1 μM), Rspodin1 (50 ng/mL), EGF (20 ng/mL), A83-01 (0.5 mM), ascorbic acid (0.5 mM, Wako) and glutamine (2 mM, Corning). EnSCs were harvested every 3-4 days and dissociated into single cells for subsequent expansion, subcloning or differentiation. Typically, EnSCs at passage 20 were selected for quality control tests including those of morphology, viability, purity, sterility, karyotype, as well as whole genome sequencing. WB20 EnSC line was finally selected as a clinical grade clone as it was devoid of known cancer-related mutations and with the lowest overall mutational burden compared to patient PBMC. EnSCs and their derivatives were tested in immunocompromised mice (SCID Beige) for tumor-forming potential for 6 months of observation.

### **Scalable differentiation of EnSCs into E-islets**

EnSCs were thawed and expanded with T225 flasks at a starting concentration of 2x10<sup>6</sup>/flask. Sterility was tested before the initiation of differentiation. For the induction of pancreatic endoderm (1<sup>st</sup> stage), EnSCs were treated in MCDB with a cocktail containing LDN-193189 (200 nM), Noggin (20 ng/mL), ActivinA (0.5 ng/mL) FGF10 (20 ng/mL) Rspodin1 (20 ng/mL), EGF (20 ng/mL) and TPPB (500 nM) for 2 days; during day 2-4 of induction, cells were further differentiated in MCDB supplemented



with LDN-193189 (200 nM), FGF10 (20 ng/mL), EGF (20 ng/mL), SANT1 (0.5  $\mu$ M), ascorbic acid (0.5 mM) and retinoic acid (2  $\mu$ M); during day 4-6 of differentiation, cells were cultured in the presence of FGF10 (50 ng/mL), EGF (20 ng/mL), SANT1 (0.3  $\mu$ M), retinoic acid (0.2  $\mu$ M), Nicotinamide (10 mM) and ascorbic acid (0.5 mM). At the end of this stage, pancreatic progenitor (PP) cells were single-cell dispersed and suspended in AggreWell (STEMCELL) to form homogeneous cell clusters for 3 days and then transferred to orbital shakers (90~110 rpm) for further islet tissue reconstruction and maturation. For endocrine progenitor (EP) induction (3<sup>rd</sup> stage), triple inhibition of BMP, TGF- $\beta$  and Notch signaling pathways was manipulated for 10 days in the presence of Noggin (20 ng/mL), A83-01 (0.5 mM), gamma-secretase inhibitor XX (2  $\mu$ M, MERCK), retinoic acid (0.1  $\mu$ M) and SANT1 (0.1  $\mu$ M). For the maturation of endocrine cells (4<sup>th</sup> stage, 8-10 days), T3 (1  $\mu$ M), Nicotinamide (10 mM) and BMP4 (2 ng/mL) were added to the 3<sup>rd</sup> stage recipe. MCDB was routinely supplemented with glucose (22.5mM, Sigma), sodium bicarbonate (Sigma) and ITS-X (Invitrogen), GlutaMAX (Invitrogen) and ascorbic acid (0.5 mM, Wako). All cytokines were purchased from R&D Systems, with GMP grade if applicable.

### **Release criteria**

Release criteria is provided in Supplementary Table S6.

### **Quality control methods**

#### **RNA extraction and quantitative real-time PCR**

The reverse transcription and qRT-PCR reactions were performed as reported previously (Cheng et al., 2012). The RNAs was prepared with an RNA kit (TIANGEN) according to the manufacturer's directions and reverse-transcribed into cDNAs using random hexamers and oligo (dT) primers with GoScript Reverse Transcriptase (Promega). The qRT-PCR reactions were performed using an ABI Q6 (Life) system and SYBR Green Master Mix (Roche). The expression levels were normalized to the housekeeping gene *TBP*. The primer information is provided in Supplementary Table

S7.

### **Flow cytometry**

Cell samples were collected as single cells. The staining of surface markers was performed in PBS with 0.2% BSA. The cells were incubated with antibodies for 30 minutes on ice. For intracellular proteins, cells were fixed with 1.6% PFA at 37 °C for 30 minutes and washed with the Permeabilization Wash buffer (BioLegend). The antibodies were incubated for 30 minutes at RT. Finally, cells were analyzed using a flow cytometer Celesta or Fortessa (BD). For cell viability test, calcein blue dye (Invitrogen) was used to mark live cell. Incubate cells and analyze using a flow cytometer Celesta or Fortessa (BD). See antibody information in Supplementary Table S8.

### **Immunofluorescence**

E-islets were fixed with 4% PFA for 15 minutes at 4 °C and permeabilized with 0.5% Triton-100 before blocking. E-islets were washed three times with PBST (0.05% Tween 20 in PBS) for 10 minutes at room temperature (RT) both before and after each staining step, and blocked with 2% BSA at 4 °C for 2 hours. E-islets were stained with diluted primary antibodies at 4 °C overnight, and the samples were then incubated in the diluted secondary antibodies for 2 hours at 4 °C. All antibodies were diluted in 2% BSA in PBS. Prolong Gold Antifade reagent with DAPI (Invitrogen) was used to counterstain the nuclei. E-islets were analyzed using confocal fluorescence microscopes (Olympus FV3000). The images of E-islets were captured and 3D-projected using the Olympus software. The antibody information is listed in Supplementary Table S8.

### **In vitro static glucose stimulated insulin (C-peptide) secretion assay**

Before glucose stimulation, E-islets or primary islets were rinsed and starved in Krebs-Ringer buffer supplemented with 2 mM glucose for 2 hours at 37 °C. For glucose stimulation, E-islets were treated alternately by Krebs-Ringer buffer with low (2 mM) or high (20 mM) glucose. Supernatants were collected after 30 minutes of each

stimulation. C-peptide was measured by a human C-peptide ELISA kit (Merckodia, 10-1141-01) according to the manufacturer's instruction.

### **Mycoplasma, sterility and endotoxin tests**

Culture supernatant samples were sent to a certified laboratory, Shanghai Simple Gene Medical Laboratory, for testing.

### **Karyotype analysis**

EnSC samples were sent to a certified laboratory, Shanghai Simple Gene Medical Laboratory, for standard G-banded Chromosome analysis.

### **Whole genome sequencing**

#### *DNA preparation*

DNA degradation and contamination was monitored on 0.8% agarose gels. DNA purity was checked using the NanoPhotometer® spectrophotometer (IMPLEN, CA, USA). DNA concentration was measured using Qubit® DNA Assay Kit in Qubit® 3.0 Fluorometer (Life Technologies, CA, USA).

#### *DNA Library preparation and sequencing*

The NEB Next® Ultra DNA Library Prep Kit for Illumina® (NEB, USA) was used to construct the libraries for sequencing as per the manufacturer's instructions. DNA was fragmented into ~200 base pair pieces. The end of the DNA fragment was subjected to an end repair process that included the addition of a single "A" base, followed by ligation of the adapters. Products were purified and enriched by polymerase chain reaction (PCR) to amplify the library DNA. The final libraries were quantified using KAPA Library Quantification kit (KAPA Biosystems, South Africa) and an Agilent 2100 Bioanalyzer. Paired-end sequencing (2 × 150 base pair) was performed on an Illumina NovaSeq 6000 sequencer (Illumina, USA).

## **Single cell RNA sequencing and data processing**

### *Cell capture and cDNA synthesis*

E-islets were dissociated into single cells with 0.25% trypsin and resuspended at  $1 \times 10^6$  cells per milliliter in  $1 \times$  PBS. Using single cell 3' Library and Gel Bead Kit V3.1(10x Genomics, 1000121) and Chromium Single Cell G Chip Kit (10x Genomics, 1000120), the cell suspension (300-600 living cells per microliter determined by Count Star) was loaded onto the Chromium single cell controller (10x Genomics) to generate single-cell gel beads in the emulsion according to the manufacturer's protocol. In short, single cells were suspended in PBS containing 0.04% BSA. About 10,000 cells were added to each channel, and the target cell will be recovered was estimated to be about 15,000 cells. Captured cells were lysed and the released RNA were barcoded through reverse transcription in individual GEMs. Reverse transcription was performed on a S1000TM Touch Thermal Cycler (Bio Rad) at 53°C for 45 min, followed by 85°C for 5 min, and hold at 4°C. The cDNA was generated and then amplified, and quality assessed using an Agilent 4200 (performed by CapitalBio Technology, Beijing).

### *Single cell RNA-Seq library preparation and sequencing*

According to the manufacture's introduction, Single-cell RNA-seq libraries were constructed using Single Cell 3' Library and Gel Bead Kit V3.1. The libraries were finally sequenced using an Illumina Novaseq6000 sequencer with a sequencing depth of at least 30,000 reads per cell with pair-end 150 bp (PE150) reading strategy (performed by CapitalBio Technology, Beijing). 15244 cells were sequenced and 2721 cells with low UMI (UMI counts <5000) were excluded from sequenced cells during tSNE clustering analysis.

## **Animal studies**

### **Teratoma formation test**

SCID Beige (4~6 weeks) male mice were transplanted with  $1 \times 10^5$  hPSCs or  $1 \times 10^7$  EnSCs intramuscularly or cervical subcutaneously. The formation of teratoma was monitored during the period of 6 months.

## **Transplantation of E-islets into Streptozodocin (STZ)-induced diabetic model mice**

STZ was dissolved immediately before injection in 50 mM sodium citrate buffer (pH 4.5) to a final concentration of 20 mg/mL, and kept in dark and low temperature before injection. The administrations of STZ were completed within 5 minutes after the dissolution. SCID Beige male mice (4~6 weeks) were treated with 170 mg/kg STZ (Sigma-Aldrich, S0130) by intraperitoneal injection after 4 hours of starvation. The fasting blood glucose were measured at days 5 and 8, in a tail bleed using a hand-held blood glucose meter (Roche) to ensure hyperglycemia. E-islets (1000~2000 IEQ) were transplanted under left kidney capsules of diabetic mice. Glucose-stimulated human C-peptide secretion was measured by collecting mouse serum from the eye socket after 16 hours of fasting and at 25 minutes after glucose intraperitoneal injection (3 g/kg, 30% solution).

## **Transplantation of E-islets into STZ-induced diabetic monkey**

### *Induction of diabetes in monkey*

To induce hyperglycemia, male Cynomolgus monkey (3~6 years) were fasted overnight and treated twice (with an interval of 2 weeks), with a dose of 50 mg/kg STZ intravenous injection. STZ was freshly dissolved before injection in sodium citrate buffer (pH 4.5) to final concentration of 25 mg/ml. The tail tip blood glucose was measured four times a day, before and 2 hours after feeding in the morning and afternoon. The dose of exogenous insulin treatment for animal was determined according to pre-prandial blood glucose.

### *Immunosuppression strategy*

The immunosuppression treatment was started 2 days before transplantation (day -2). Sirolimus (0.5 mg, q.d., p.o.) and mycophenolate mofetil dispersible tablet (62.5 mg, b.i.d., p.o.) were administered daily since day -2. Diclofenac sodium suppository (50

mg, p.r.) was used 30 minutes before transplantation. ATG (12.5 mg, i.v.) was injected 1 hour before and 48 hours after transplantation. Etanercept (25 mg, i.h.) was used 1 hour before transplantation and days 3 and 7 after transplantation.

### *Transplant surgeries*

The animal was fasted for at least 4 hours and anaesthetized with intramuscular injection of Zoletil®50 at 3-5 mg/kg. Heart rate, temperature, blood oxygenation and blood pressure were monitored in real time during the surgical procedure. E-islets (6000 or 30000 IEQ) were transplanted through B-ultrasound-mediated percutaneous hepatic portal vein injection. Antibiotic treatment was continued for 7 days post transplantation. Two diabetic monkeys were transplanted with 6000 (Monkey 1) or 30000 (Monkey 2) E-islets, respectively. Monkey 1 was used to test the feasibility of hepatic portal injection of E-islets without DSA, while Monkey 2 was used for evaluating the short-term safety and effectiveness of E-islets.

## **Transplantation of E-islets into diabetic humanized mice**

### *Generation of humanized mice by engraftment of human PBMCs*

PBMCs of the patient or an unrelated volunteer were isolated from whole blood using Ficoll gradient, respectively. NCG-hIL15 female mice (6 weeks) were treated with 250 cGy of radiation 4 hours before PBMC infusion. Five million PBMCs were injected into lateral tail vein for each mouse. Efficiency of PBMC engraftment was evaluated by flow cytometry weekly following the injection, by proportion of mCD45/hCD45 cells in mice blood. The percentage of hCD45 cells increased to > 40% within two weeks.

### *Induction of diabetes, transplantation and evaluation*

After identification of engraftment of human PBMCs, humanized mice were treated with 170 mg/kg STZ (Sigma-Aldrich, S0130) by intraperitoneal injection after 4 hours of starvation. One thousand E-islets generated from patient's EnSCs were transplanted

under the left kidney capsule of 1) NCG-hIL15 mice humanized with the patient's PBMCs, or 2) NCG-hIL15 mice humanized with PBMCs from an unrelated volunteer. Fasting blood glucose were measured every two days. Glucose-stimulated human C-peptide secretion was performed as described above. Animals were sacrificed at 28 days posttransplantation and were examined for graft survival by immunofluorescence of islet markers (C-peptide, Glucagon, PDX1, NKX6-1) in tissue sections.

## **Clinical studies**

### **Dosage Design**

The rationale behind the dosage of 1.2 million IEQ units for E-islet transplantation of this T2D patient is based on the following facts: 1) there are approximately 4~6 million IEQs of islets in a healthy person, and it is estimated that only 1/3 of the islets function upon glucose stimulation under physiological condition, which means ~1.5 million IEQs of islets might be enough for glycemic control. This is confirmed by the clinical observation that transplantation of 800,000 IEQs of cadaveric islets would normally lead to independency of exogenous insulin in most T1D patients (see references below); 2) the patient's endogenous beta cell mass was significantly diminished (estimated at 50% reduction at least), judging from the pre and the post-prandial c-peptide levels; and 3) a significant number of E-islets are likely lost during the vascularization process, as E-islets contain only pancreatic endodermal cells but not vascular endothelial cells that are important for the post-transplantation revascularization of cadaveric islets. We chose the dosage of 1.2 million IEQs, as we speculated that 50% of E-islets might be lost during the engraftment, and that the residual 0.6 million IEQs might be enough to supplement the endogenous islet function.

### **E-islet transplantation**

Conforming to the regulatory guidance from the clinical islet transplantation registration (CITR), the patient had an image-guided percutaneous transhepatic islet infusion with a local anesthetic, into the main portal circulation with heparinization.

Patency of the main portal vein was assessed by monitoring portal pressure during infusion of islets, and doppler ultrasonography after the infusion. A total of 1.2 million IEQs of E-islets that were generated as a single batch and passed the release criteria were directly delivered without prior cryopreservation.

### **Mixed Meal Tolerance Test (MMTT)**

After overnight ( $\geq 10$  hours) fasting, at 7:30 AM, the patient was asked to consume within 5 minutes a standard mixed meal including 200 g steamed buns and 50 mL water at a constant speed. Blood samples were collected before (0 min) and at 15, 30, 60, 120, 180 and 240 minutes after ingesting. Degludec was not administered 24 hours before MMTT, and oral antidiabetic medications were not administered 20 hours prior to MMTT.

### **References**

Shapiro A M. Islet transplantation in type 1 diabetes: ongoing challenges, refined procedures, and long-term outcome. *Rev Diabet Stud*, 2012, 9(4): 385-406.

Shapiro A M, Pokrywczynska M, Ricordi C. Clinical pancreatic islet transplantation. *Nat Rev Endocrinol*, 2017, 13(5): 268-77.

Shapiro A M, Lakey J R, Ryan E A, et al. Islet transplantation in seven patients with type 1 diabetes mellitus using a glucocorticoid-free immunosuppressive regimen. *N Engl J Med*, 2000, 343(4): 230-8.



Figure S1

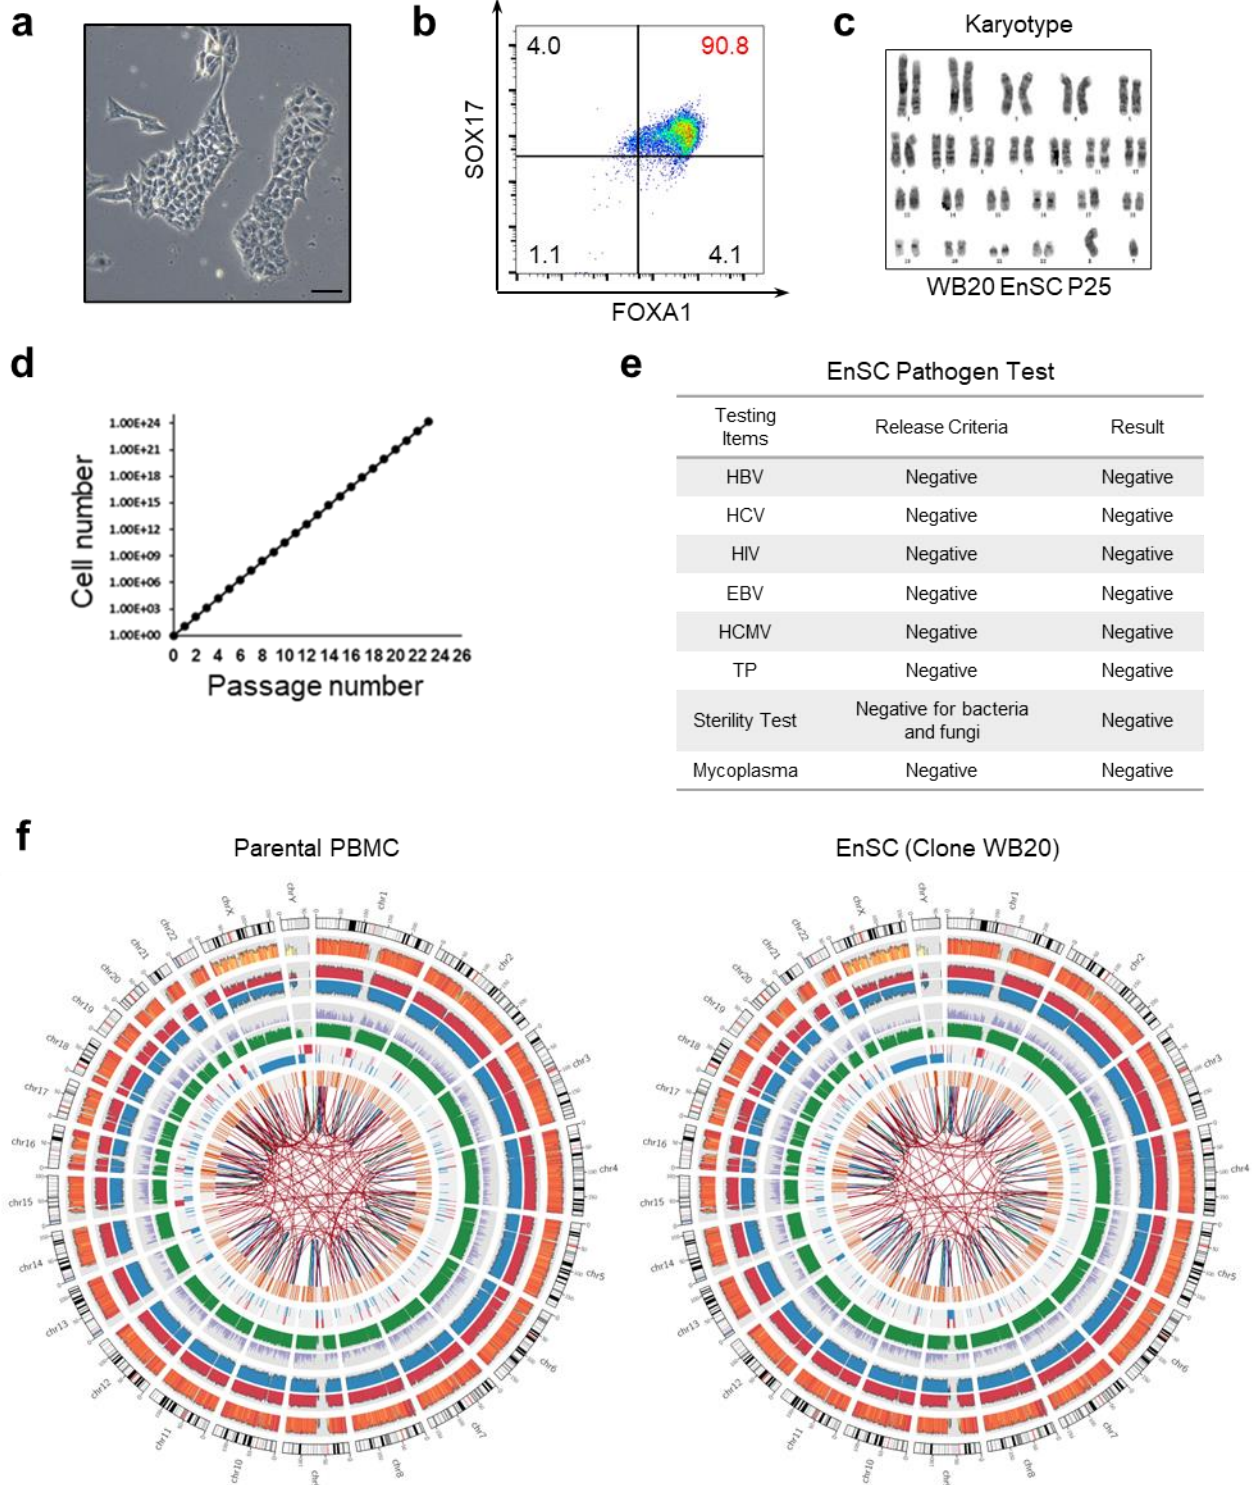

From outside to inside: Circle 1: chromosome; circle 2: density map of SNV; circle 3: density map of Indel insertion; circle 4: density map of Indel deletion; circle 5: density map of mutation sites occurring in the coding region; circle 6: density map of mutation sites occurring in the non-coding region; circle 7: location map of CNV; circle 8: location map of SV; circle 9: type association map of SV.

### Supplementary Fig. S1. Quality control of EnSCs

**a** Morphology of EnSCs. **b** Result of FACS, revealing the proportion of SOX17+ / FOXA1+ cells in EnSCs. **c** Karyotyping result of WB20 EnSC line. **d** Growth curve of

EnSCs. **e** Release criteria and the results of pathogen testing for EnSCs. **f** Circos plots of parental PBMC (left) and EnSC (clone WB20) (right) for genomic variations from WGS analysis. From outside to inside, each of nine circles represents one aspect of genomic variations. Circle 1: chromosome; circle 2: density map of SNV (single nucleotide variation); circle 3: density map of Indel insertion; circle 4: density map of Indel deletion; circle 5: density map of mutation sites occurring in the coding region; circle 6: density map of mutation sites occurring in the non-coding region; circle 7: location map of CNV (copy number variation), with red and blue columns indicating copy number gain and loss, respectively; circle 8: location map of SV (structural variation), with orange and green columns indicating deletion and insertion, respectively; circle 9: type association map of SV, with blue, red and green lines indicating inversion, interchromosomal translocation and intrachromosomal translocation, respectively.

Figure S2

Pancreatic progenitor stage

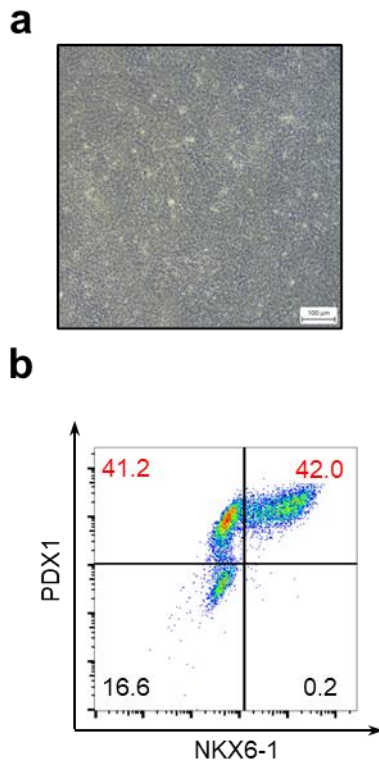

Endocrine progenitor stage

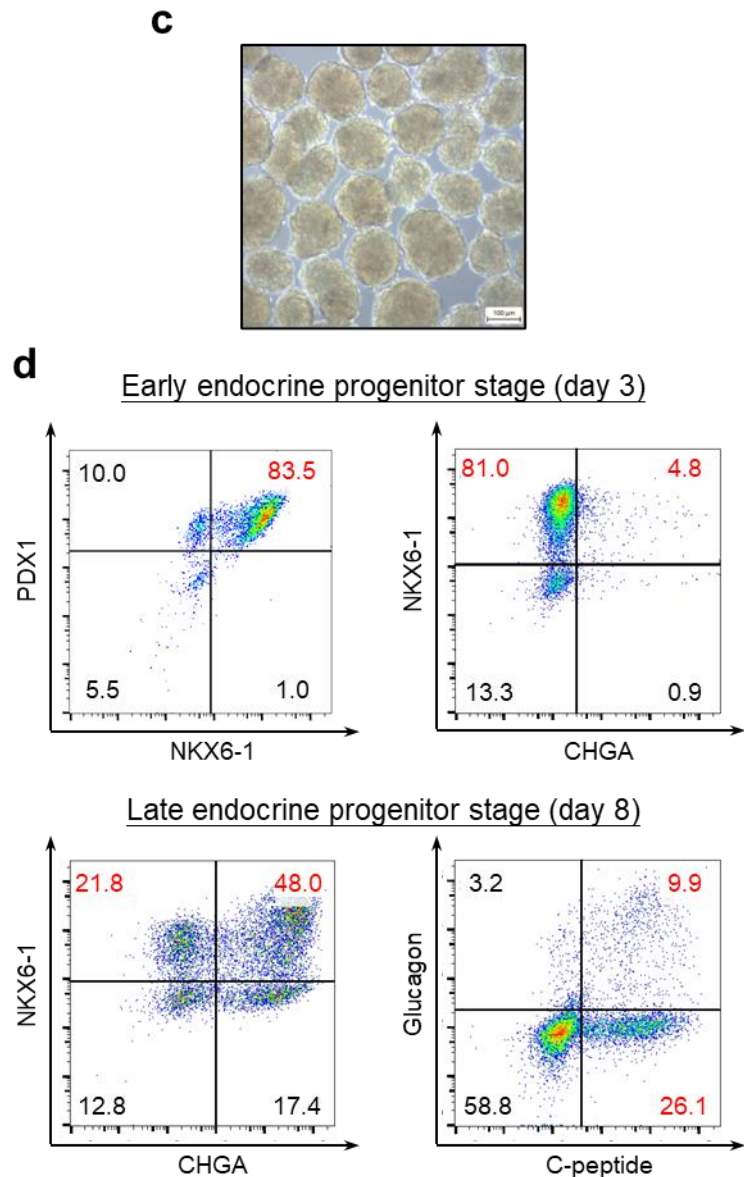

**Supplementary Fig. S2. Quality control of intermediate pancreatic differentiation stages of EnSCs**

**a** and **b** Morphology and the cell composition of the differentiation culture at the pancreatic progenitor (PP) stage. **a** is a representative phase contrast image of EnSC-derived PP cells. **b** shows the FACS data revealing the proportion of NKX6-1<sup>+</sup> / PDX1<sup>+</sup> PP cells at this stage. **c** and **d** Morphology and the cell composition of the differentiation culture at the endocrine progenitor (EP) stage. **c** is a representative phase contrast image of EnSC-derived EP cells. **d** shows the FACS data revealing the proportion of NKX6-1<sup>+</sup> / PDX1<sup>+</sup> and CHGA<sup>-</sup> / NKX6-1<sup>+</sup> PP cells that are differentiating towards the

CHGA+ endocrine progenitors at early endocrine progenitor stage (day 3 of EP stage) and the proportion of CHGA+ endocrine progenitors and emerging endocrine (C-peptide + or Glucagon+) cells at late endocrine progenitor stage (day 8 of EP stage). Scale bars, 100  $\mu\text{m}$ .



Figure S3

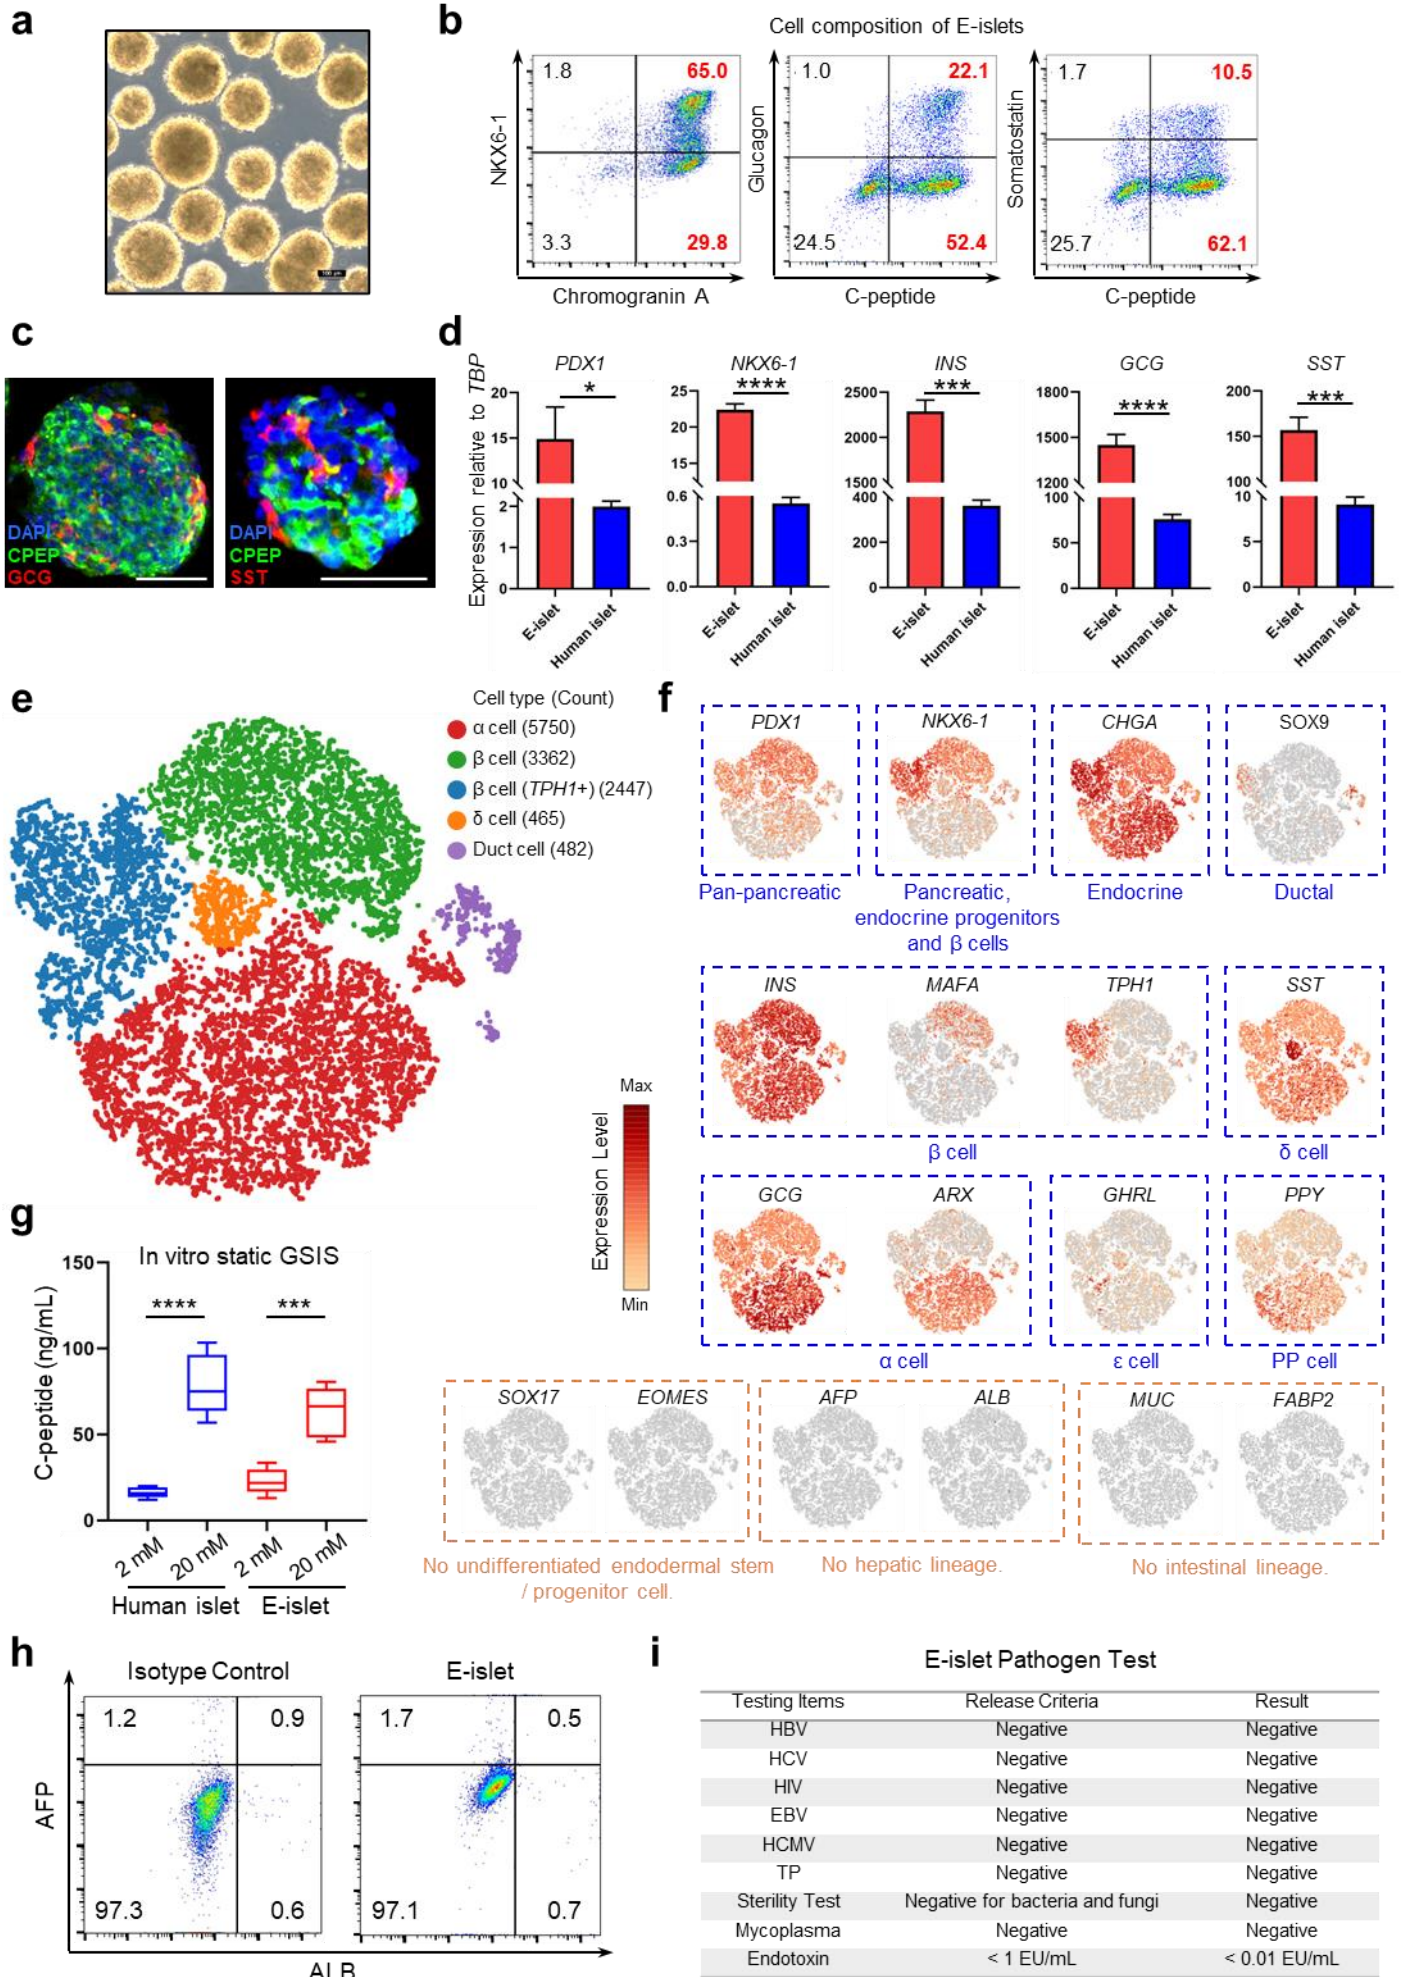

### Supplementary Fig. S3. Quality control of E-islets

**a** Morphology of E-islets (scale bar, 100  $\mu\text{m}$ ). **b** Results from FACS analysis of pancreatic endocrine cells in E-islets, with Chromogranin A<sup>+</sup> population representing the pan-endocrine compartment, C-peptide<sup>+</sup> Glucagon<sup>-</sup> population representing  $\beta$  cells, Glucagon<sup>+</sup> population representing  $\alpha$  cells and Somatostatin<sup>+</sup> population representing  $\delta$  cells. **c** immunofluorescence staining of E-islets that have C-peptide (CPEP) positive  $\beta$  cells, glucagon (GCG) positive  $\alpha$  cells, as well as somatostatin (SST) positive  $\delta$  cells (scale bars, 50  $\mu\text{m}$ ). **d** Expression levels of the indicated genes in E-islets and adult human islets measured by quantitative RT-PCR (qRT-PCR), among which *PDX1*, *NKX6.1* and Insulin (*INS*) are expressed by adult  $\beta$  cells, while Glucagon (*GCG*) and Somatostatin (*SST*) are typically expressed by adult  $\alpha$  cells and  $\delta$  cells, respectively. **e** and **f** Clustering and gene expression among the subpopulations of E-islets, revealed by single cell transcriptomic analysis (scRNA seq, 10 $\times$  Genomics). **e** is the tSNE clustering data of scRNA seq, showing the various subpopulations of E-islets (2721 cells with low UMI are excluded from 15244 sequenced cells). **f** shows the expression of representative genes for the cell types (indicated by the boxes with blue dotted lines) in E-islets. **g** C-peptide secretions from human (primary) islets and E-islets in response to low and high glucose stimulations under static conditions (GSIS). **h** FACS data, revealing the nontarget hepatic lineages (Alpha fetoprotein/AFP<sup>+</sup> or Albumin/ALB<sup>+</sup> cells) are undetectable in E-islets. **i** Release criteria and results of pathogen testing for E-islets.

Figure S4

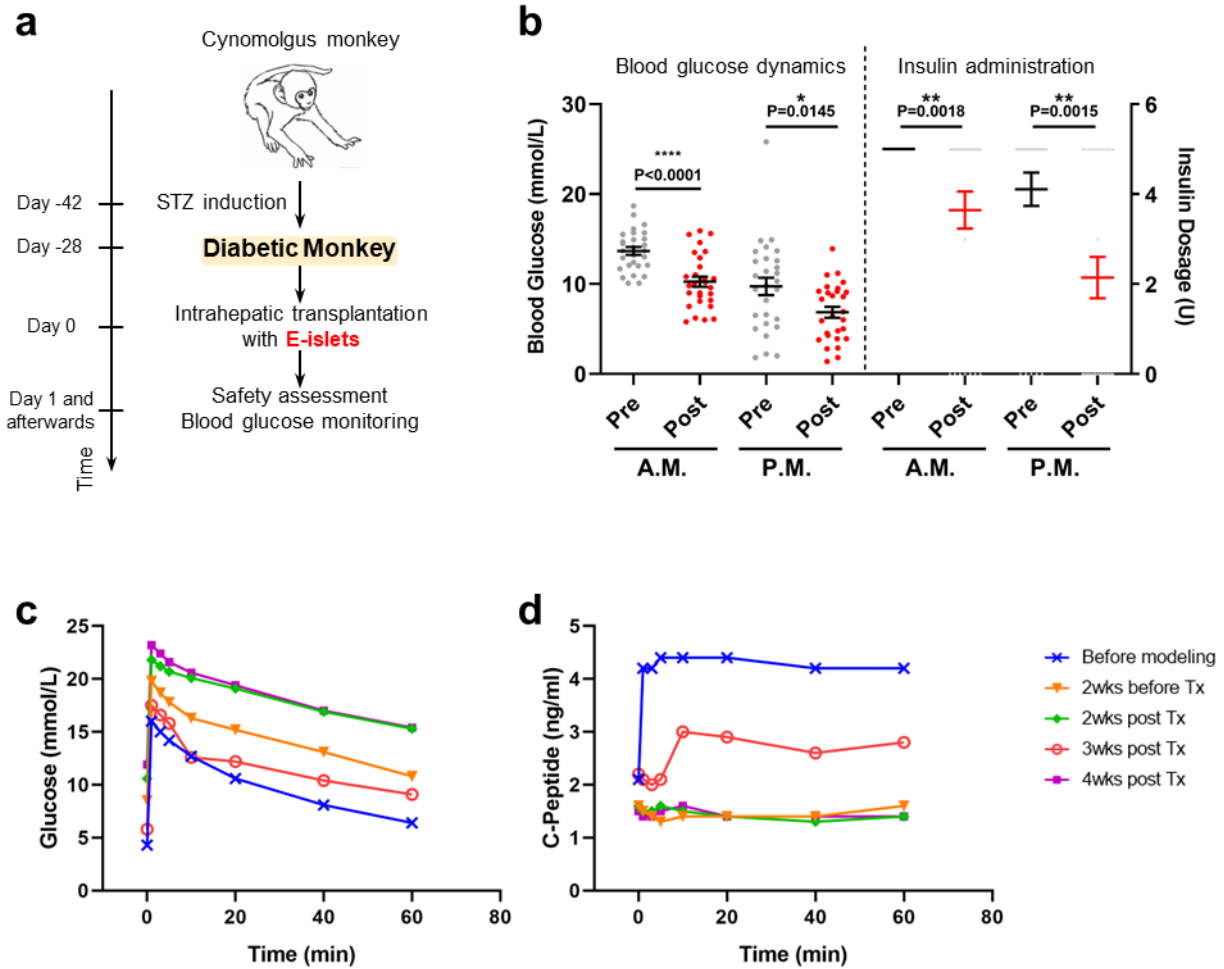

**Supplementary Fig. S4. E-islets ameliorate diabetes in STZ-induced diabetic monkeys**

**a** Schematic illustration of the hepatic portal implantation of E-islets into STZ-induced diabetic monkeys. Two diabetic monkeys were transplanted with 6000 (Monkey 1) or 30000 (Monkey 2) E-islets, respectively. Monkey 1 was used to test the feasibility of hepatic portal injection of E-islets without DSA, while Monkey 2 was used for evaluating the short-term safety and effectiveness of E-islets. The tail tip blood glucose was measured before feeding in the morning and afternoon. The dose of exogenous insulin treatment for animal was determined according to preprandial blood glucose. **b** Daily preprandial blood glucose levels (left) and insulin administration dosage (right) during the 28 day-periods before and after surgery (Pre: pre-surgery; Post: post-surgery; A.M.: before breakfast; P.M.: before dinner). **c** and **d** Results of the 8-time-point intravenous glucose tolerance tests (IVGTT) of the E-islet-transplanted STZ-induced

diabetic monkey. The patterns of blood glucose (**c**) and human C-peptide (**d**) were monitored by IVGTT before diabetes modeling / STZ treatments (before diabetes modeling), 2 weeks before transplantation (2wks before Tx), as well as 2, 3 and 4 weeks posttransplantation (2wks, 3wks, and 4wks post Tx).



Figure S5

**a Patient humanized mice**

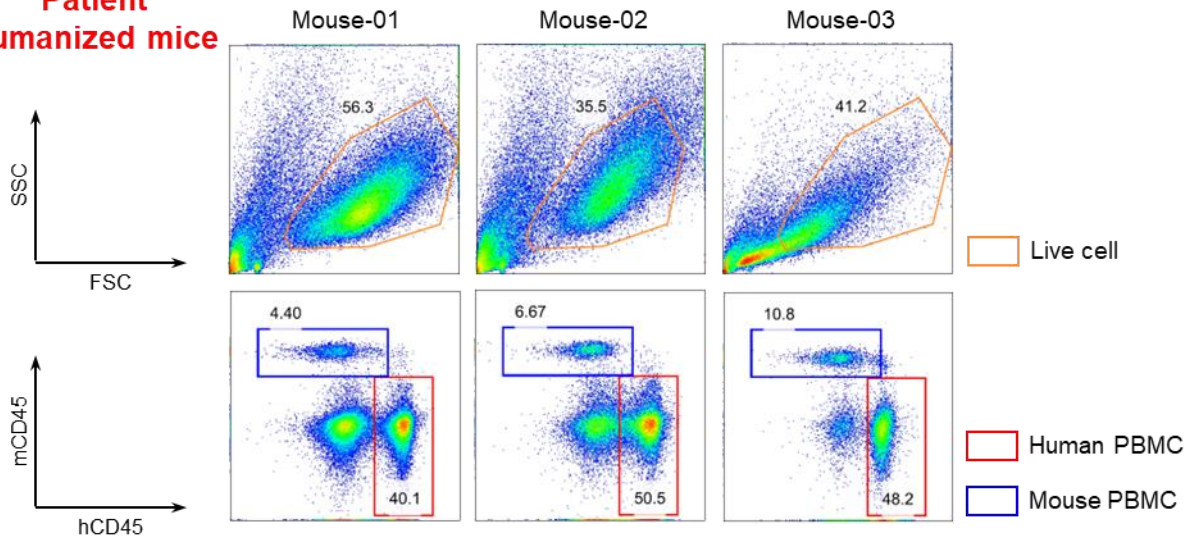

**b Volunteer humanized mice**

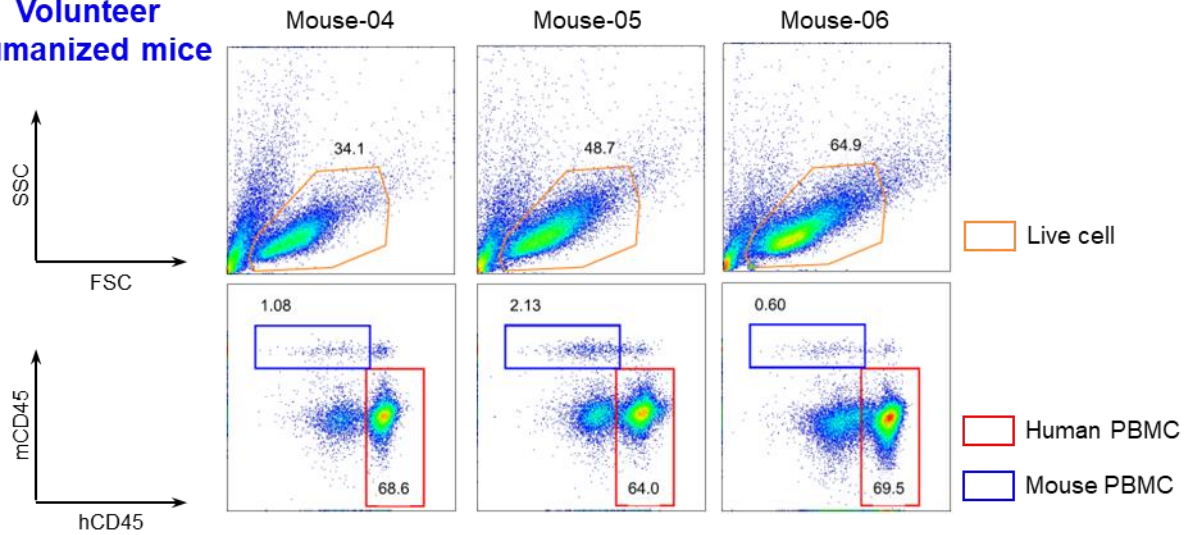

**c Patient humanized mice**

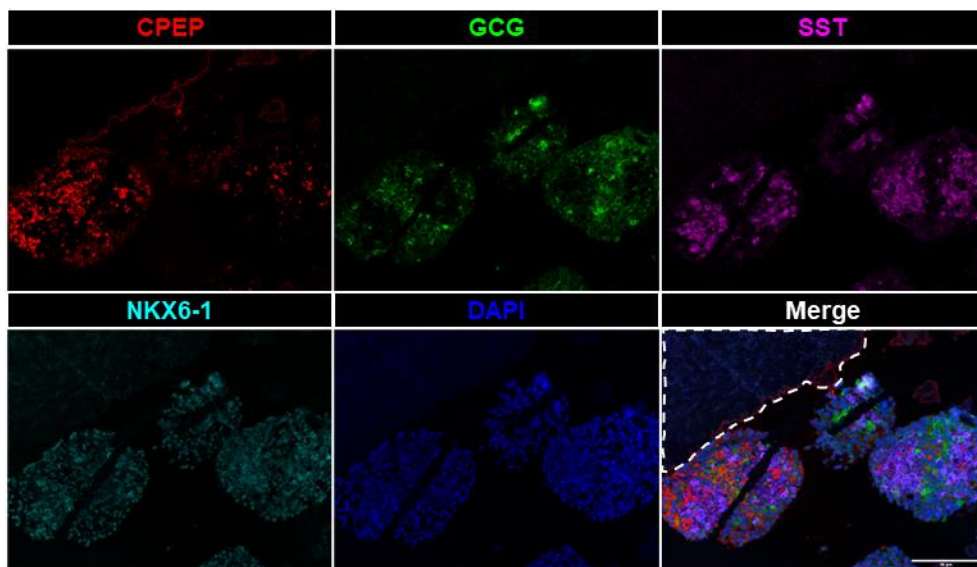

### **Supplementary Fig. S5. Characterization of humanized mice**

**a** and **b** Characterization of NCG-hIL15 mice humanized with either patient (**a**) or volunteer (**b**)-derived PBMCs by the presence of hCD45<sup>+</sup> human cells in peripheral blood. **a** Proportions of live cells (by SSC and FSC), human-derived blood cells (hCD45<sup>+</sup>) and mouse blood cells (mCD45<sup>+</sup>), among the three patient humanized mice. **b** Proportions of live cells, human-derived and mouse blood cells, among the three volunteer humanized mice. **c** Immunofluorescence staining of the grafts harvested under kidney capsule of the patient humanized mice for the presence of human  $\beta$  cells (C-peptide + and NKX6-1 +),  $\alpha$  cells (Glucagon +), and  $\delta$  cells (Somatostatin +); C-peptide (CPEP, red), Glucagon (GCG, green), Somatostatin (SST, violet) and NKX6-1 (Cyan); the area defined by the white dotted line indicating the mouse kidney tissue; scale bar, 50  $\mu$ m.

Figure S6

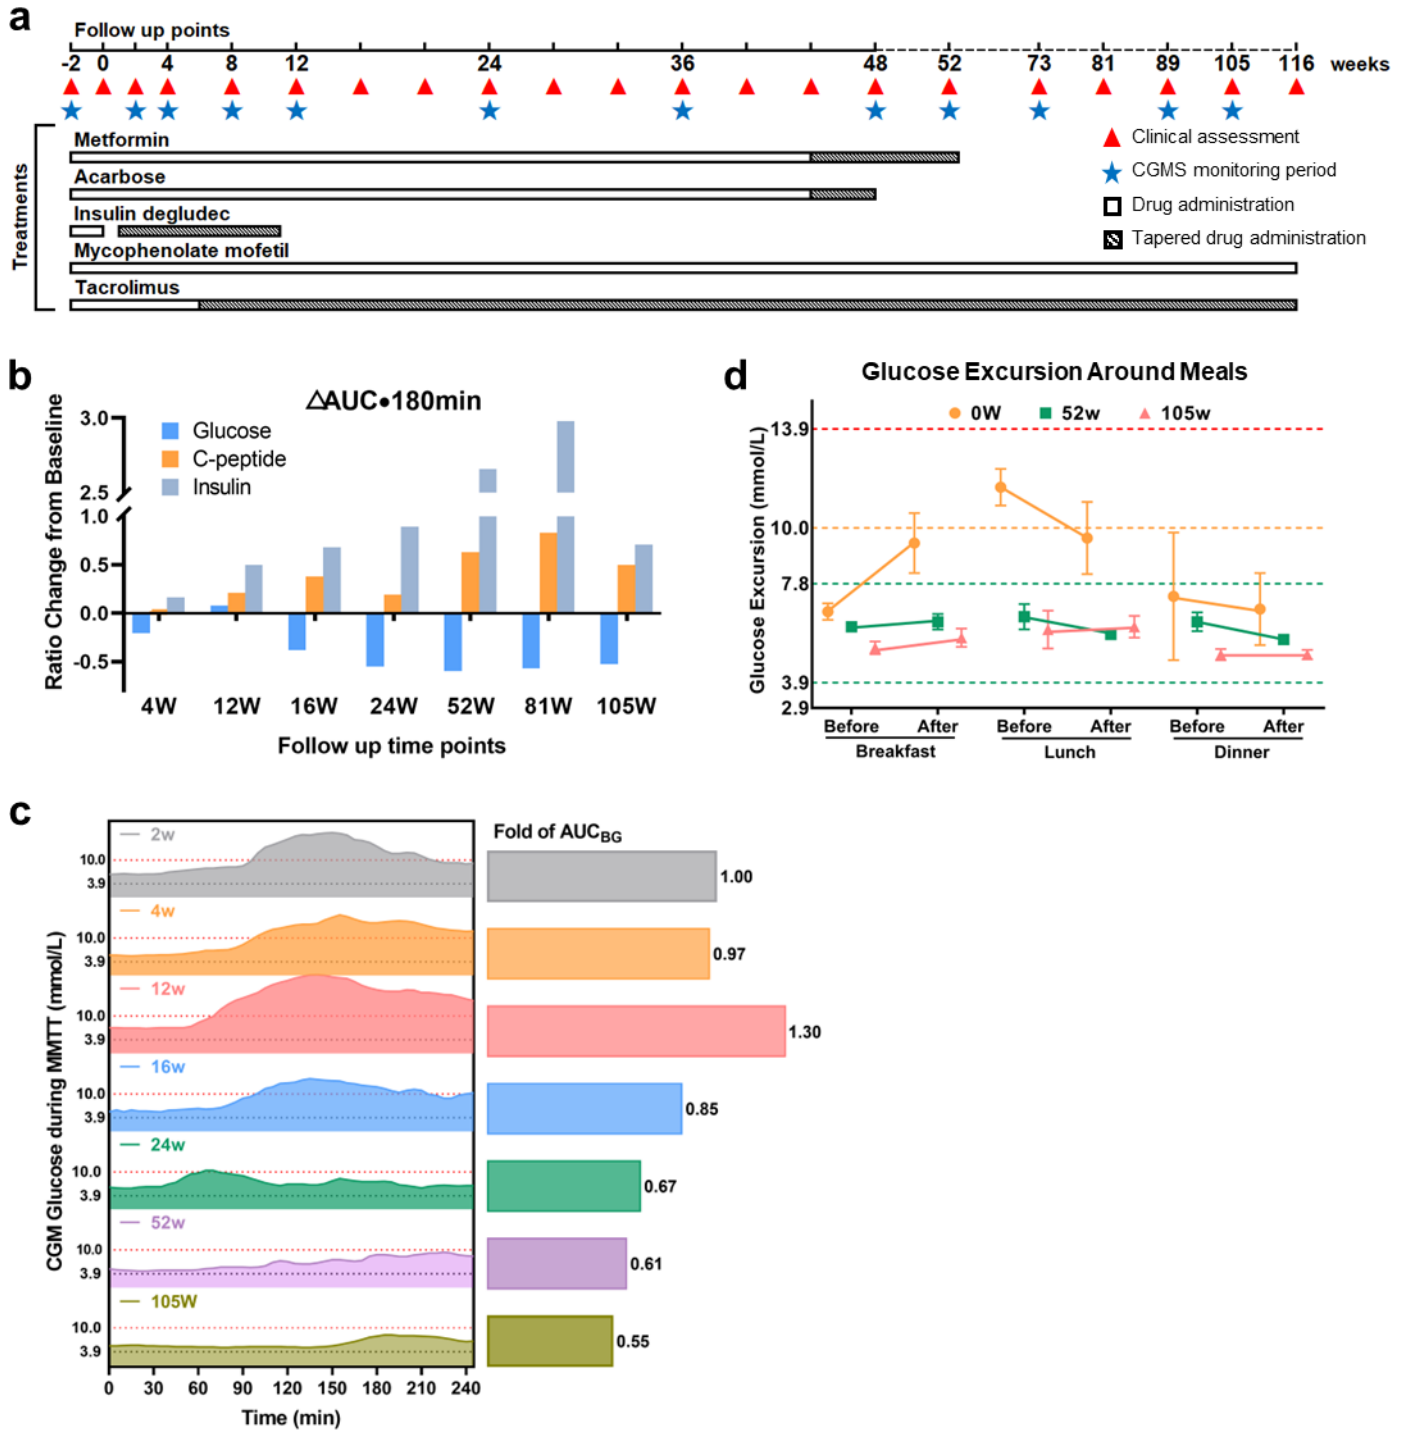

**Supplementary Fig. S6. Clinical assessments and outcomes of glycemic control**

**a** Schematic illustration of follow-up time points for routine and disease-specific clinical assessments, as well as the treatments the patient received during the whole follow-up period. Examinations of endocrine function and diabetes-specific parameters by mixed-meal tolerance tests (MMTT) were performed at baseline and at 4, 8, 12, 16,

20, 24, 36 and 48 weeks and thereafter at specified time points. The glycemic control of the patient was measured with a 24-hour real-time blood glucose monitoring (CGM) system. The baseline and follow-up CGM glucose values were measured throughout the first 52 weeks and thereafter during specified time periods, and the mean duration of CGM device wearing is at least 3 days. The main preconditioning regimen included antihyperglycemic medication and immunosuppressant treatments. The antidiabetic treatment included metformin (0.75 g bid, tapered from week 44 and interrupted from week 56) and acarbose (50 mg tid, tapered from the week 44 and interrupted from week 48). The insulin analog degludec had been administered since 2021 (20 U once daily at bedtime) but interrupted right after E-islet transplantation, and had been resumed and tapered from week 2, and was stopped at the end of week 11. Graft-versus-host disease was treated with mycophenolate mofetil (administered since kidney transplantation at 0.5 g bid) and tacrolimus (administered orally after kidney transplantation at 1~3 mg bid, depending on the serum FK506 concentrations). ☆ represents the follow-up time points of clinical assessment, and △ represents the CGMS monitoring periods. The checkerboard design represents the tapering period. **b** Areas under the curves (AUCs) derived from the 5-point (0, 30, 60, 120, 180 min) intravenous glucose (Figure 1j), C-peptide (Figure 1k) and insulin (Figure 1l) values in the results of the mixed meal tolerance tests (MMTT). **c** Results of continuous glucose monitoring during MMTTs (0-240 minutes) at various follow-up time points, measured by CGM device at intervals of every 5 minutes. The horizontal dotted lines at 3.9 and 10.0 mM demarcate the target glucose range. Fold of AUCs (right panel) are the areas under the curves of each follow-up time points, normalized to the AUC of week 2 (2W). **d** Prandial glucose excursions (mean amplitude glucose excursion, MAGE), the gold standard of blood glucose variability, represented by mean glucose values (within 95% ranges) of 1.5 hours before and 2 hours after each meal at baseline, week 52 and week 105. The green horizontal lines at 3.9 and 7.8 mM demarcate the target glucose excursion for healthy individuals.

Figure S7

50% Median 25-75% Range 5-95% Range

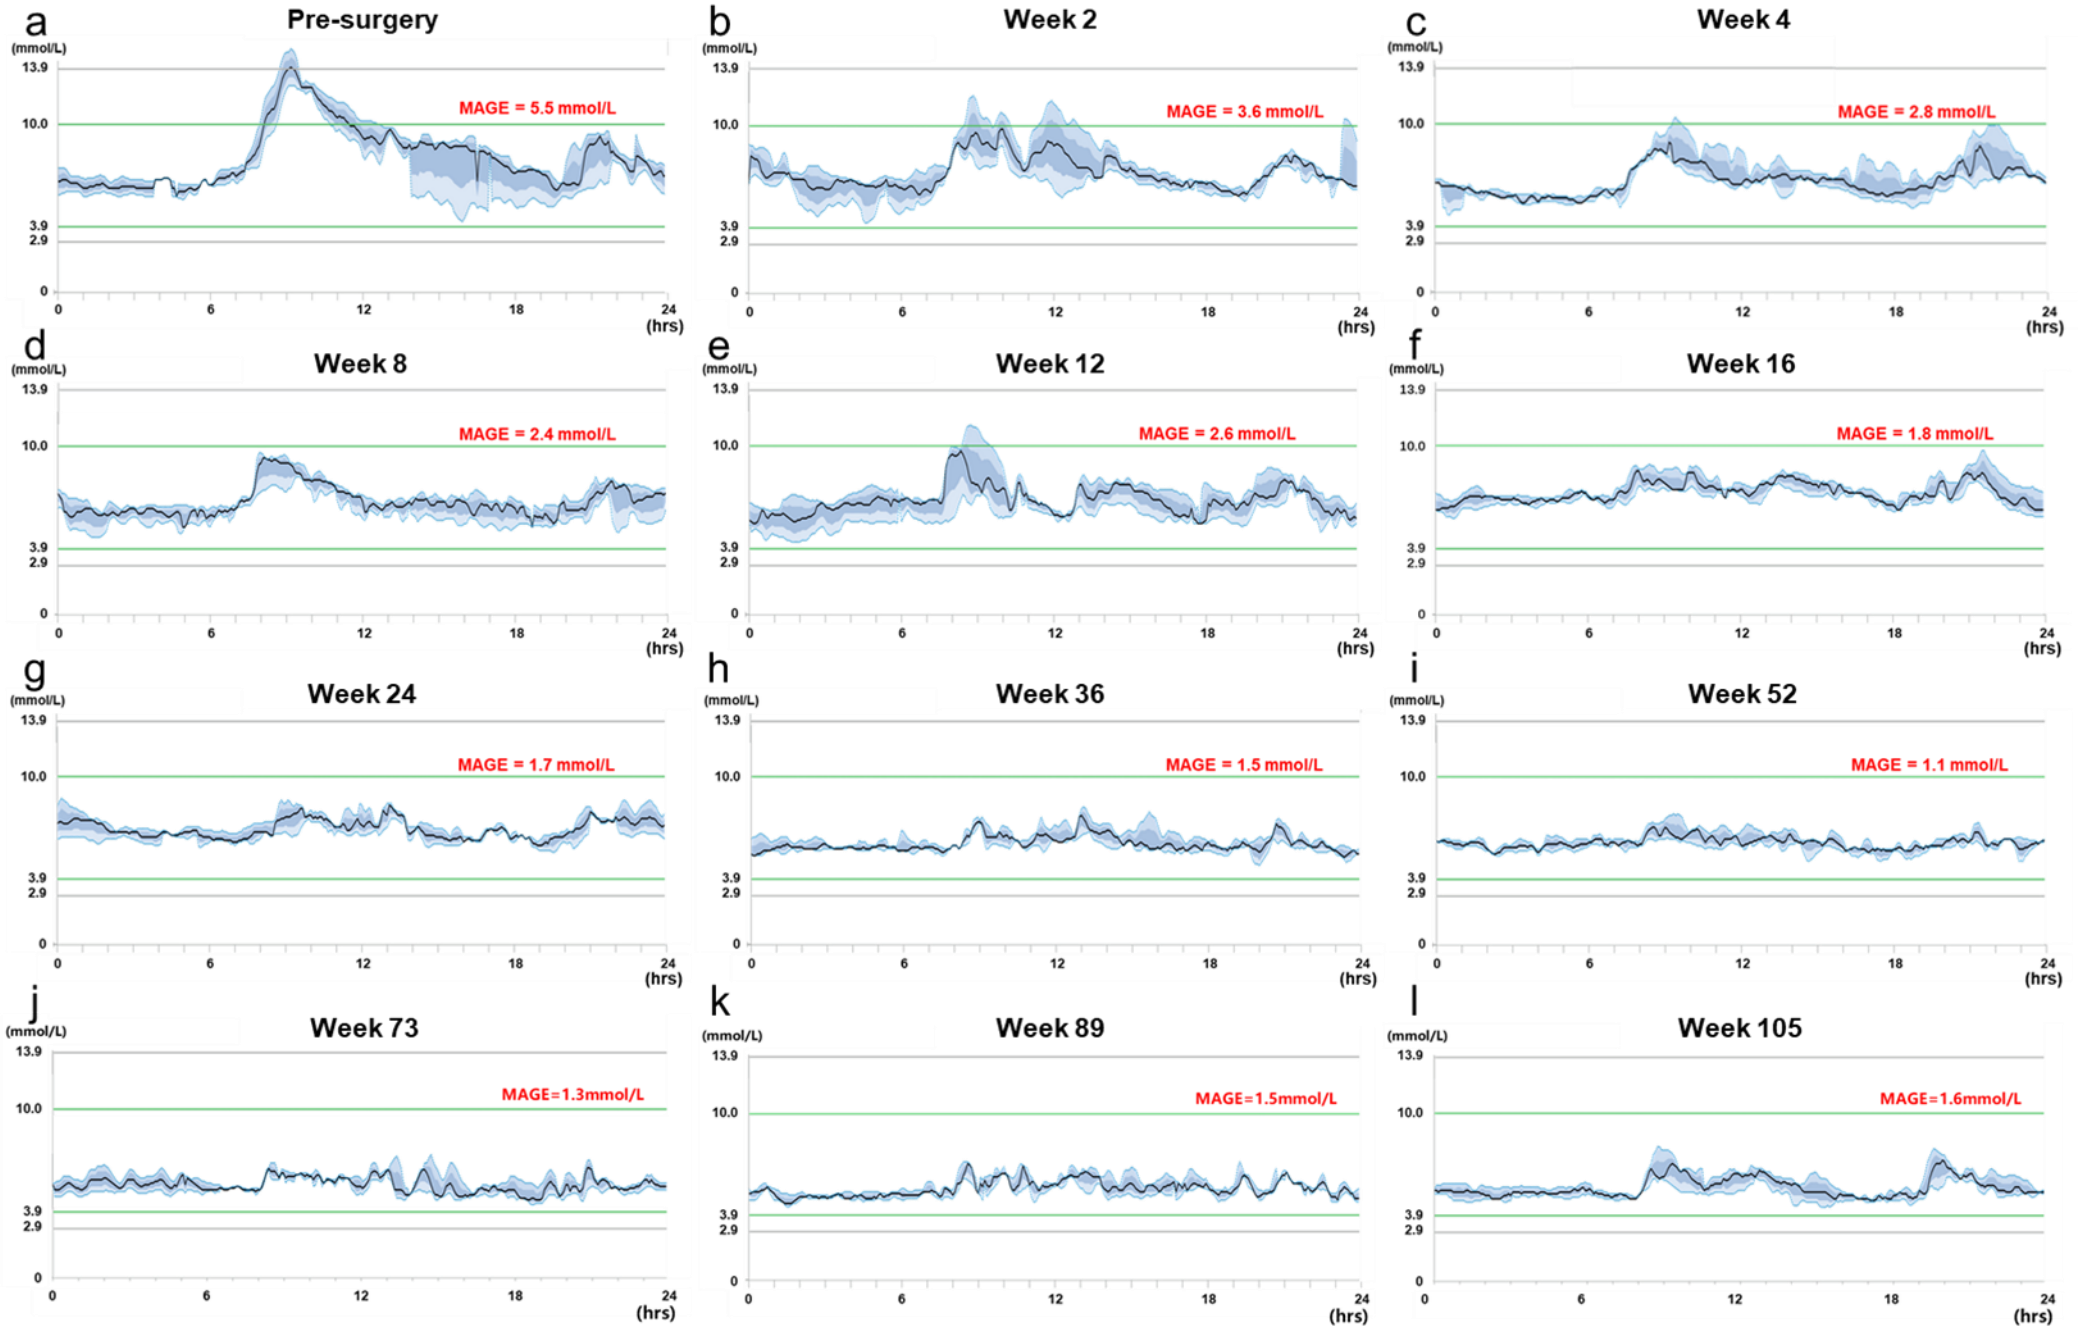

**Supplementary Fig. S7. Continuous glucose monitoring at various follow-up time points**

**a-l** Continuous glucose monitoring (CGM) traces at presurgery (**a**) and various follow-up time points (**b-l**). For each follow-up time point, GCM data were collected from continuous 72 hours. The median (navy lines) the 25-75% (medium blue areas) and 5-95% (pale blue areas) ranges are shown, with the green horizontal lines demarcating the target glucose range (3.9 to 10.0 mM) for diabetic patients. The prandial glucose excursions (MAGE), calculated from mean glucose values (within 95% ranges), are listed on each panel in red.

## Supplementary Table Information

### Supplementary Table S1. Exploratory objectives

**Tab.S1: Exploratory objectives**

| Parameter                                                           | Baseline        | 2W             | 4W             | 8W             | 12W           | 16W            | 24W            | 36W            | 52W            | 85W            | 113W           | Normal Range   |
|---------------------------------------------------------------------|-----------------|----------------|----------------|----------------|---------------|----------------|----------------|----------------|----------------|----------------|----------------|----------------|
| <b>HbA1c concentration (%)</b>                                      | 6.6             | -              | 6.8            | 7              | 7             | -              | 6.5            | 6.2            | 5.2            | 5.5            | 4.6            | 4.0-6.0        |
| Change from baseline (%)                                            | 0.00            | -              | 0.20           | 0.40           | 0.40          | -              | -0.10          | -0.40          | -1.40          | -1.10          | -2.00          |                |
| <b>CGMS values</b>                                                  | <b>Baseline</b> | <b>2W</b>      | <b>4W</b>      | <b>8W</b>      | <b>12W</b>    | <b>16W</b>     | <b>24W</b>     | <b>36W</b>     | <b>52W</b>     | <b>73W</b>     | <b>89W</b>     | <b>105W</b>    |
| <b>Average [(Mean ± SD) mM]</b>                                     | 7.77<br>± 2.04  | 7.18<br>± 1.41 | 6.69<br>± 1.13 | 6.56<br>± 1.02 | 6.65<br>± 1.2 | 7.24<br>± 0.71 | 6.87<br>± 0.71 | 6.06<br>± 0.57 | 6.08<br>± 0.48 | 5.50<br>± 0.59 | 5.52<br>± 0.62 | 5.56<br>± 0.69 |
| <b>MAGE (mM)</b>                                                    | 5.50            | 3.60           | 2.80           | 2.40           | 2.60          | 1.80           | 1.70           | 1.50           | 1.10           | 1.30           | 1.50           | 1.60           |
| <b>Proportion of T1TR (3.9-7.8mM, %)</b>                            | 56.70           | 77.80          | 85.40          | 89.50          | 89.10         | 81.10          | 88.40          | 99.20          | 99.60          | 100.00         | 100.00         | 100.00         |
| Change from baseline (%)                                            | -               | 21.10          | 28.70          | 32.80          | 32.40         | 24.40          | 31.70          | 42.50          | 42.90          | 43.30          | 43.30          | 43.30          |
| <b>Proportion of T1R (3.9-10.0mM, %)</b>                            | 87.70           | 94.10          | 98.70          | 100.00         | 98.10         | 100.00         | 100.00         | 100.00         | 100.00         | 100.00         | 100.00         | 100.00         |
| Change from baseline (%)                                            | -               | 6.40           | 11.00          | 12.30          | 10.40         | 12.30          | 12.30          | 12.30          | 12.30          | 12.30          | 12.30          | 12.30          |
| <b>TAR &gt;10.0 mM, (%)</b>                                         | 10.70           | 5.90           | 1.30           | 0.00           | 1.90          | 0.00           | 0.00           | 0.00           | 0.00           | 0.00           | 0.00           | 0.00           |
| Change from baseline (%)                                            | -               | -4.80          | -9.40          | -10.70         | -8.80         | -10.70         | -10.70         | -10.70         | -10.70         | -10.70         | -10.70         | -10.70         |
| <b>TAR &gt;13.9 mM, (%)</b>                                         | 1.30            | 0.00           | 0.00           | 0.00           | 0.00          | 0.00           | 0.00           | 0.00           | 0.00           | 0.00           | 0.00           | 0.00           |
| Change from baseline (%)                                            | -               | -1.30          | -1.30          | -1.30          | -1.30         | -1.30          | -1.30          | -1.30          | -1.30          | -1.30          | -1.30          | -1.30          |
| <b>TBR &lt;3.9 mM, (%)</b>                                          | 0.30            | 0.00           | 0.00           | 0.00           | 0.00          | 0.00           | 0.00           | 0.00           | 0.00           | 0.00           | 0.00           | 0.00           |
| Change from baseline (%)                                            | -               | -0.30          | -0.30          | -0.30          | -0.30         | -0.30          | -0.30          | -0.30          | -0.30          | -0.30          | -0.30          | -0.30          |
| <b>TBR &lt;2.9 mM, (%)</b>                                          | 0.00            | 0.00           | 0.00           | 0.00           | 0.00          | 0.00           | 0.00           | 0.00           | 0.00           | 0.00           | 0.00           | 0.00           |
| <b>Incidence of episode of hypoglycaemia (≤70 mg/dL), n per day</b> | 0.30            | 0.00           | 0.00           | 0.00           | 0.00          | 0.00           | 0.00           | 0.00           | 0.00           | 0.00           | 0.00           | 0.00           |
| <b>AUC<sub>MMTT</sub></b>                                           | -               | 2673.75        | 2600.50        | 3294.75        | 3467.25       | 2272.25        | 1800.00        | 1809.75        | 1638.25        | N/A            | N/A            | 1474.00        |
| Ratio change from 2 week                                            | -               | 1.00           | 0.97           | 1.23           | 1.30          | 0.85           | 0.67           | 0.68           | 0.61           | N/A            | N/A            | 0.55           |

HbA1c=glycated haemoglobin A1c.

Data are estimated mean (SE); TAR = time above range; TBR = time below range; TIR = time in range; T1TR = Time in tight range. Time (minutes), Percent (%), N/A: Not available.

Supplementary Table S2. Summary of SNV discovered from whole genome sequencing of EnSCs compared to parental PBMCs

| #CHROM | Start     | End       | REF | ALT | QUAL    | Func.refGene        | Gene.refGene              | GeneDetail.refGene                                                                                                                                                                                                                                                                                                                                                                                                                                                                                                                                                                                                                                                       | ExonicFunc.refGene | AAChange.refGene                                                                                                                                                                                                                                                                                                                                                                                                                                                                                                                                                                                           | WB20 | WB_PBMC |
|--------|-----------|-----------|-----|-----|---------|---------------------|---------------------------|--------------------------------------------------------------------------------------------------------------------------------------------------------------------------------------------------------------------------------------------------------------------------------------------------------------------------------------------------------------------------------------------------------------------------------------------------------------------------------------------------------------------------------------------------------------------------------------------------------------------------------------------------------------------------|--------------------|------------------------------------------------------------------------------------------------------------------------------------------------------------------------------------------------------------------------------------------------------------------------------------------------------------------------------------------------------------------------------------------------------------------------------------------------------------------------------------------------------------------------------------------------------------------------------------------------------------|------|---------|
| chr1   | 1081649   | 1081649   | C   | G   | 1414.3  | downstream          | C1orf159                  | -                                                                                                                                                                                                                                                                                                                                                                                                                                                                                                                                                                                                                                                                        | -                  | -                                                                                                                                                                                                                                                                                                                                                                                                                                                                                                                                                                                                          | 0/1  | 1/1     |
| chr1   | 1363602   | 1363602   | T   | C   | 1032.05 | upstream            | MXRA8                     | -                                                                                                                                                                                                                                                                                                                                                                                                                                                                                                                                                                                                                                                                        | -                  | -                                                                                                                                                                                                                                                                                                                                                                                                                                                                                                                                                                                                          | 1/1  | 0/1     |
| chr1   | 6104619   | 6104619   | C   | G   | 1244.53 | UTR3                | UTR3                      | NM_015557.3:c.*855G>C                                                                                                                                                                                                                                                                                                                                                                                                                                                                                                                                                                                                                                                    | -                  | -                                                                                                                                                                                                                                                                                                                                                                                                                                                                                                                                                                                                          | 0/1  | 1/1     |
| chr1   | 10358685  | 10358685  | A   | G   | 795.18  | ncRNA exonic        | LOC105376725              | -                                                                                                                                                                                                                                                                                                                                                                                                                                                                                                                                                                                                                                                                        | -                  | -                                                                                                                                                                                                                                                                                                                                                                                                                                                                                                                                                                                                          | 0/1  | 1/1     |
| chr1   | 11777648  | 11777648  | A   | G   | 3523.54 | ncRNA exonic        | C1orf167-AS1              | -                                                                                                                                                                                                                                                                                                                                                                                                                                                                                                                                                                                                                                                                        | -                  | -                                                                                                                                                                                                                                                                                                                                                                                                                                                                                                                                                                                                          | 0/1  | 1/1     |
| chr1   | 16617656  | 16617656  | T   | C   | 9999.19 | ncRNA exonic        | LOC105376794              | -                                                                                                                                                                                                                                                                                                                                                                                                                                                                                                                                                                                                                                                                        | -                  | -                                                                                                                                                                                                                                                                                                                                                                                                                                                                                                                                                                                                          | 1/1  | 0/1     |
| chr1   | 16620359  | 16620359  | A   | G   | 9634.16 | ncRNA exonic        | LOC105376794              | -                                                                                                                                                                                                                                                                                                                                                                                                                                                                                                                                                                                                                                                                        | -                  | -                                                                                                                                                                                                                                                                                                                                                                                                                                                                                                                                                                                                          | 0/1  | 1/1     |
| chr1   | 16623287  | 16623287  | T   | C   | 144.16  | ncRNA exonic        | LOC105376794              | -                                                                                                                                                                                                                                                                                                                                                                                                                                                                                                                                                                                                                                                                        | -                  | -                                                                                                                                                                                                                                                                                                                                                                                                                                                                                                                                                                                                          | 0/1  | 0/0     |
| chr1   | 16723673  | 16723673  | G   | A   | 201.27  | downstream          | TRG-CCCS-1                | -                                                                                                                                                                                                                                                                                                                                                                                                                                                                                                                                                                                                                                                                        | -                  | -                                                                                                                                                                                                                                                                                                                                                                                                                                                                                                                                                                                                          | 0/1  | 0/0     |
| chr1   | 21938117  | 21938117  | T   | G   | 1856.13 | upstream            | HSPG2                     | -                                                                                                                                                                                                                                                                                                                                                                                                                                                                                                                                                                                                                                                                        | -                  | -                                                                                                                                                                                                                                                                                                                                                                                                                                                                                                                                                                                                          | 1/1  | 0/1     |
| chr1   | 24744706  | 24744706  | A   | T   | 846.48  | upstream            | CLIC4                     | -                                                                                                                                                                                                                                                                                                                                                                                                                                                                                                                                                                                                                                                                        | -                  | -                                                                                                                                                                                                                                                                                                                                                                                                                                                                                                                                                                                                          | 1/1  | 0/1     |
| chr1   | 25819427  | 25819427  | T   | A   | 1170.35 | upstream;downstream | MTFR1L-LOC646471          | -                                                                                                                                                                                                                                                                                                                                                                                                                                                                                                                                                                                                                                                                        | -                  | -                                                                                                                                                                                                                                                                                                                                                                                                                                                                                                                                                                                                          | 0/1  | 1/1     |
| chr1   | 30732548  | 30732548  | C   | T   | 2235.13 | UTR3                | LAPTMs5                   | NM_006762.3:c.*1280G>A.XM_011542098.2:c.*1280G>A                                                                                                                                                                                                                                                                                                                                                                                                                                                                                                                                                                                                                         | -                  | -                                                                                                                                                                                                                                                                                                                                                                                                                                                                                                                                                                                                          | 1/1  | 0/1     |
| chr1   | 30732949  | 30732949  | T   | C   | 3108.13 | UTR3                | LAPTMs5                   | NM_006762.3:c.*879A-G.XM_011542098.2:c.*879A-G                                                                                                                                                                                                                                                                                                                                                                                                                                                                                                                                                                                                                           | -                  | -                                                                                                                                                                                                                                                                                                                                                                                                                                                                                                                                                                                                          | 1/1  | 0/1     |
| chr1   | 32280150  | 32280150  | G   | A   | 386.13  | exonic              | LCK                       | -                                                                                                                                                                                                                                                                                                                                                                                                                                                                                                                                                                                                                                                                        | nonsynonymous_SNV  | LCK:XM_011541453.3:exon10:c.G1288A;p.V430M.LCK:NM_001330468.2:exon11:c.G1114A;p.V372M.LCK:XM_024447046.1:exon11:c.G1441A;p.V481M.LCK:XM_024447047.1:exon11:c.G1441A;p.V481M.LCK:NM_001042771.2:exon12:c.G1267A;p.V423M.LCK:NM_005356.5:exon12:c.G1267A;p.V423M                                                                                                                                                                                                                                                                                                                                             | 0/1  | 0/0     |
| chr1   | 52140816  | 52140816  | G   | C   | 1648.13 | upstream            | LOC107984956              | -                                                                                                                                                                                                                                                                                                                                                                                                                                                                                                                                                                                                                                                                        | -                  | -                                                                                                                                                                                                                                                                                                                                                                                                                                                                                                                                                                                                          | 1/1  | 0/1     |
| chr1   | 70132486  | 70132486  | G   | T   | 83.93   | UTR3                | LRRc7                     | NM_001366838.3:c.*10599G>T.NM_001370785.2:c.*10599G>T.NM_001366839.3:c.*10599G>T.NM_001330635.3:c.*10599G>T.NM_001366841.1:c.*10753G>T.NM_001350216.2:c.*10753G>T                                                                                                                                                                                                                                                                                                                                                                                                                                                                                                        | -                  | -                                                                                                                                                                                                                                                                                                                                                                                                                                                                                                                                                                                                          | 0/1  | 0/0     |
| chr1   | 85277901  | 85277901  | C   | A   | 761.16  | ncRNA exonic        | LOC646826                 | -                                                                                                                                                                                                                                                                                                                                                                                                                                                                                                                                                                                                                                                                        | -                  | -                                                                                                                                                                                                                                                                                                                                                                                                                                                                                                                                                                                                          | 1/1  | 0/1     |
| chr1   | 85491071  | 85491071  | C   | A   | 73.93   | ncRNA exonic        | LOC107985054              | -                                                                                                                                                                                                                                                                                                                                                                                                                                                                                                                                                                                                                                                                        | -                  | -                                                                                                                                                                                                                                                                                                                                                                                                                                                                                                                                                                                                          | 0/1  | 0/0     |
| chr1   | 85629715  | 85629715  | C   | A   | 1283.2  | ncRNA exonic        | LOC107985057,LOC112268231 | -                                                                                                                                                                                                                                                                                                                                                                                                                                                                                                                                                                                                                                                                        | -                  | -                                                                                                                                                                                                                                                                                                                                                                                                                                                                                                                                                                                                          | 0/1  | 1/1     |
| chr1   | 94541903  | 94541903  | G   | A   | 52.14   | upstream            | F3                        | -                                                                                                                                                                                                                                                                                                                                                                                                                                                                                                                                                                                                                                                                        | -                  | -                                                                                                                                                                                                                                                                                                                                                                                                                                                                                                                                                                                                          | 0/1  | 0/0     |
| chr1   | 109503471 | 109503471 | G   | A   | 94.14   | downstream          | AMIGO1                    | -                                                                                                                                                                                                                                                                                                                                                                                                                                                                                                                                                                                                                                                                        | -                  | -                                                                                                                                                                                                                                                                                                                                                                                                                                                                                                                                                                                                          | 0/1  | 0/0     |
| chr1   | 145992806 | 145992806 | T   | A   | 4579.13 | UTR3                | TXNIP                     | NM_001313972.2:c.*1045A>T.XM_017000085.2:c.*1162A>T.NM_006472.6:c.*1045A>T                                                                                                                                                                                                                                                                                                                                                                                                                                                                                                                                                                                               | -                  | -                                                                                                                                                                                                                                                                                                                                                                                                                                                                                                                                                                                                          | 1/1  | 0/1     |
| chr1   | 145992816 | 145992816 | G   | C   | 4654.13 | UTR3                | TXNIP                     | NM_001313972.2:c.*1035C>G.XM_017000085.2:c.*1152C>G.NM_006472.6:c.*1035C>G                                                                                                                                                                                                                                                                                                                                                                                                                                                                                                                                                                                               | -                  | -                                                                                                                                                                                                                                                                                                                                                                                                                                                                                                                                                                                                          | 1/1  | 0/1     |
| chr1   | 145993449 | 145993449 | G   | A   | 2444.13 | UTR3                | TXNIP                     | NM_001313972.2:c.*402C>T.XM_017000085.2:c.*519C>T.NM_006472.6:c.*402C>T                                                                                                                                                                                                                                                                                                                                                                                                                                                                                                                                                                                                  | -                  | -                                                                                                                                                                                                                                                                                                                                                                                                                                                                                                                                                                                                          | 1/1  | 0/1     |
| chr1   | 148158811 | 148158811 | C   | A   | 1198.57 | downstream          | LOC105371227              | -                                                                                                                                                                                                                                                                                                                                                                                                                                                                                                                                                                                                                                                                        | -                  | -                                                                                                                                                                                                                                                                                                                                                                                                                                                                                                                                                                                                          | 1/1  | 0/1     |
| chr1   | 155334450 | 155334450 | G   | A   | 870.14  | downstream          | ASH1L                     | -                                                                                                                                                                                                                                                                                                                                                                                                                                                                                                                                                                                                                                                                        | -                  | -                                                                                                                                                                                                                                                                                                                                                                                                                                                                                                                                                                                                          | 1/1  | 0/1     |
| chr1   | 155334451 | 155334451 | A   | G   | 533.93  | downstream          | ASH1L                     | -                                                                                                                                                                                                                                                                                                                                                                                                                                                                                                                                                                                                                                                                        | -                  | -                                                                                                                                                                                                                                                                                                                                                                                                                                                                                                                                                                                                          | 1/1  | 0/1     |
| chr1   | 156929638 | 156929638 | A   | C   | 71.13   | exonic              | LRRc71                    | -                                                                                                                                                                                                                                                                                                                                                                                                                                                                                                                                                                                                                                                                        | nonsynonymous_SNV  | LRRc71:XM_011509239.2:exon7:c.A591C;p.E197D.LRRc71:XM_011509240.3:exon7:c.A504C;p.E168D.LRRc71:NM_144702.3:exon11:c.A1149C;p.E383D.LRRc71:XM_005244926.3:exon11:c.A1149C;p.E383D.LRRc71:XM_005244927.3:exon11:c.A1149C;p.E383D.LRRc71:XM_005244928.2:exon11:c.A1149C;p.E383D.LRRc71:XM_006711187.3:exon11:c.A1149C;p.E383D.LRRc71:XM_017000459.2:exon11:c.A1149C;p.E383D.LRRc71:XM_017000460.1:exon11:c.A504C;p.E168D.LRRc71:XM_024453542.1:exon11:c.A504C;p.E168D.LRRc71:XM_006711185.3:exon12:c.A1068C;p.E366D.LRRc71:XM_017000461.1:exon12:c.A504C;p.E168D.LRRc71:XM_017000462.2:exon12:c.A504C;p.E168D | 0/1  | 0/0     |
| chr1   | 158100732 | 158100732 | G   | C   | 3049.54 | downstream          | KIRREL1                   | -                                                                                                                                                                                                                                                                                                                                                                                                                                                                                                                                                                                                                                                                        | -                  | -                                                                                                                                                                                                                                                                                                                                                                                                                                                                                                                                                                                                          | 0/1  | 1/1     |
| chr1   | 160841903 | 160841903 | T   | C   | 285.13  | splicing            | CD244                     | NM_001166663.2:exon2:c.62-2A>G.NM_016382.4:exon2:c.62-2A>G.NM_001166664.2:exon2:c.62-2A>G.XM_011509621.2:exon2:c.62-2A>G.XM_011509622.2:exon2:c.62-2A>G                                                                                                                                                                                                                                                                                                                                                                                                                                                                                                                  | -                  | -                                                                                                                                                                                                                                                                                                                                                                                                                                                                                                                                                                                                          | 0/1  | 0/0     |
| chr1   | 206587354 | 206587354 | A   | T   | 4053.52 | UTR3                | RASSF5                    | NM_182664.4:c.*506A>T.NM_182663.4:c.*376A>T.NM_182665.4:c.*376A>T                                                                                                                                                                                                                                                                                                                                                                                                                                                                                                                                                                                                        | -                  | -                                                                                                                                                                                                                                                                                                                                                                                                                                                                                                                                                                                                          | 1/1  | 0/1     |
| chr1   | 206587362 | 206587362 | C   | T   | 4191.15 | UTR3                | RASSF5                    | NM_182664.4:c.*514C>T.NM_182663.4:c.*384C>T.NM_182665.4:c.*384C>T                                                                                                                                                                                                                                                                                                                                                                                                                                                                                                                                                                                                        | -                  | -                                                                                                                                                                                                                                                                                                                                                                                                                                                                                                                                                                                                          | 1/1  | 0/1     |
| chr1   | 210326932 | 210326932 | T   | C   | 1769.16 | upstream            | HHAT                      | -                                                                                                                                                                                                                                                                                                                                                                                                                                                                                                                                                                                                                                                                        | -                  | -                                                                                                                                                                                                                                                                                                                                                                                                                                                                                                                                                                                                          | 0/1  | 1/1     |
| chr1   | 210326934 | 210326934 | T   | C   | 168.91  | upstream            | HHAT                      | -                                                                                                                                                                                                                                                                                                                                                                                                                                                                                                                                                                                                                                                                        | -                  | -                                                                                                                                                                                                                                                                                                                                                                                                                                                                                                                                                                                                          | 0/1  | 0/0     |
| chr1   | 220112475 | 220112475 | A   | C   | 54.52   | ncRNA exonic        | LOC105373475              | -                                                                                                                                                                                                                                                                                                                                                                                                                                                                                                                                                                                                                                                                        | -                  | -                                                                                                                                                                                                                                                                                                                                                                                                                                                                                                                                                                                                          | 0/1  | 0/0     |
| chr1   | 220112581 | 220112581 | C   | A   | 47.32   | ncRNA exonic        | LOC105373475              | -                                                                                                                                                                                                                                                                                                                                                                                                                                                                                                                                                                                                                                                                        | -                  | -                                                                                                                                                                                                                                                                                                                                                                                                                                                                                                                                                                                                          | 0/1  | 0/0     |
| chr2   | 6373521   | 6373521   | G   | C   | 158.13  | ncRNA exonic        | LINC01247                 | -                                                                                                                                                                                                                                                                                                                                                                                                                                                                                                                                                                                                                                                                        | -                  | -                                                                                                                                                                                                                                                                                                                                                                                                                                                                                                                                                                                                          | 0/1  | 0/0     |
| chr2   | 7058339   | 7058339   | A   | G   | 1053.24 | UTR3                | RNF144A                   | XM_017005401.2:c.*12930A>G                                                                                                                                                                                                                                                                                                                                                                                                                                                                                                                                                                                                                                               | -                  | -                                                                                                                                                                                                                                                                                                                                                                                                                                                                                                                                                                                                          | 1/1  | 0/1     |
| chr2   | 32316038  | 32316038  | A   | C   | 1862.2  | UTR3                | YIPF4                     | NM_032312.4:c.*10412A>C                                                                                                                                                                                                                                                                                                                                                                                                                                                                                                                                                                                                                                                  | -                  | -                                                                                                                                                                                                                                                                                                                                                                                                                                                                                                                                                                                                          | 1/1  | 0/1     |
| chr2   | 32316041  | 32316041  | C   | A   | 1897.2  | UTR3                | YIPF4                     | NM_032312.4:c.*10415C>A                                                                                                                                                                                                                                                                                                                                                                                                                                                                                                                                                                                                                                                  | -                  | -                                                                                                                                                                                                                                                                                                                                                                                                                                                                                                                                                                                                          | 1/1  | 0/1     |
| chr2   | 47373967  | 47373967  | T   | C   | 2069.18 | exonic              | EPCAM                     | -                                                                                                                                                                                                                                                                                                                                                                                                                                                                                                                                                                                                                                                                        | nonsynonymous_SNV  | EPCAM:NM_002354.3:exon3:c.T344C;p.M115T                                                                                                                                                                                                                                                                                                                                                                                                                                                                                                                                                                    | 1/1  | 0/1     |
| chr2   | 66425582  | 66425582  | G   | A   | 1899.37 | ncRNA exonic        | MEIS1-AS3                 | -                                                                                                                                                                                                                                                                                                                                                                                                                                                                                                                                                                                                                                                                        | -                  | -                                                                                                                                                                                                                                                                                                                                                                                                                                                                                                                                                                                                          | 1/1  | 0/1     |
| chr2   | 74653527  | 74653527  | T   | A   | 165.13  | upstream            | SEMA4F                    | -                                                                                                                                                                                                                                                                                                                                                                                                                                                                                                                                                                                                                                                                        | -                  | -                                                                                                                                                                                                                                                                                                                                                                                                                                                                                                                                                                                                          | 0/1  | 0/0     |
| chr2   | 95669457  | 95669457  | T   | A   | 43.14   | downstream          | LOC101926959              | -                                                                                                                                                                                                                                                                                                                                                                                                                                                                                                                                                                                                                                                                        | -                  | -                                                                                                                                                                                                                                                                                                                                                                                                                                                                                                                                                                                                          | 0/1  | 0/0     |
| chr2   | 95669463  | 95669463  | T   | A   | 46.13   | downstream          | LOC101926959              | -                                                                                                                                                                                                                                                                                                                                                                                                                                                                                                                                                                                                                                                                        | -                  | -                                                                                                                                                                                                                                                                                                                                                                                                                                                                                                                                                                                                          | 0/1  | 0/0     |
| chr2   | 152120189 | 152120189 | T   | A   | 2244.13 | UTR3                | STAM2                     | NM_005843.6:c.*385A>T                                                                                                                                                                                                                                                                                                                                                                                                                                                                                                                                                                                                                                                    | -                  | -                                                                                                                                                                                                                                                                                                                                                                                                                                                                                                                                                                                                          | 1/1  | 0/1     |
| chr2   | 173074688 | 173074688 | T   | C   | 1273.16 | upstream            | MAP3K20                   | -                                                                                                                                                                                                                                                                                                                                                                                                                                                                                                                                                                                                                                                                        | -                  | -                                                                                                                                                                                                                                                                                                                                                                                                                                                                                                                                                                                                          | 1/1  | 0/1     |
| chr2   | 173074691 | 173074691 | T   | C   | 1282.16 | upstream            | MAP3K20                   | -                                                                                                                                                                                                                                                                                                                                                                                                                                                                                                                                                                                                                                                                        | -                  | -                                                                                                                                                                                                                                                                                                                                                                                                                                                                                                                                                                                                          | 1/1  | 0/1     |
| chr2   | 174330091 | 174330091 | G   | T   | 408.13  | ncRNA exonic        | LINC01305                 | -                                                                                                                                                                                                                                                                                                                                                                                                                                                                                                                                                                                                                                                                        | -                  | -                                                                                                                                                                                                                                                                                                                                                                                                                                                                                                                                                                                                          | 0/1  | 0/0     |
| chr2   | 175626807 | 175626807 | T   | C   | 281.13  | ncRNA exonic        | LOC107985962              | -                                                                                                                                                                                                                                                                                                                                                                                                                                                                                                                                                                                                                                                                        | -                  | -                                                                                                                                                                                                                                                                                                                                                                                                                                                                                                                                                                                                          | 0/1  | 0/0     |
| chr2   | 236124193 | 236124193 | G   | A   | 471.92  | UTR3                | AGAP1                     | NM_014914.5:c.*71G>A.NM_001037131.3:c.*71G>A.XM_006712235.3:c.*71G>A.XM_006712234.3:c.*71G>A.XM_005248959.4:c.*71G>A.XM_011510549.2:c.*71G>A.XM_017003282.1:c.*71G>A.XM_006712238.3:c.*71G>A.XM_011510548.2:c.*71G>A.XM_006712237.3:c.*71G>A.XM_011510547.2:c.*71G>A.XM_024452672.1:c.*71G>A                                                                                                                                                                                                                                                                                                                                                                             | -                  | -                                                                                                                                                                                                                                                                                                                                                                                                                                                                                                                                                                                                          | 0/1  | 0/0     |
| chr2   | 237565690 | 237565690 | T   | C   | 626.14  | upstream            | PRLH                      | -                                                                                                                                                                                                                                                                                                                                                                                                                                                                                                                                                                                                                                                                        | -                  | -                                                                                                                                                                                                                                                                                                                                                                                                                                                                                                                                                                                                          | 0/1  | 0/0     |
| chr2   | 241352963 | 241352963 | G   | T   | 3119.12 | UTR3                | SEPTIN2                   | NM_001349306.1:c.*1026G>T.NM_001349315.1:c.*1026G>T.NM_006155.2:c.*1026G>T.NM_001008491.2:c.*1026G>T.XM_024452926.1:c.*1026G>T.XM_017004212.2:c.*1026G>T.XM_024452923.1:c.*1026G>T.NM_001349310.1:c.*1026G>T.NM_001349314.1:c.*1026G>T.NM_001349309.1:c.*1026G>T.NM_001349312.1:c.*1026G>T.NM_001349308.1:c.*1026G>T.NM_001349309.1:c.*1026G>T.NM_001349302.1:c.*1026G>T.NM_001349307.1:c.*1026G>T.NM_001349288.1:c.*1026G>T.NM_001349291.1:c.*1026G>T.NM_001008492.2:c.*1026G>T.NM_001321035.1:c.*1026G>T.NM_001349311.1:c.*1026G>T.NM_001349305.1:c.*1026G>T.NM_001321029.1:c.*1026G>T.NM_001349287.1:c.*1026G>T.NM_001349313.1:c.*1026G>T.NM_001321031.1:c.*1026G>T,N | -                  | -                                                                                                                                                                                                                                                                                                                                                                                                                                                                                                                                                                                                          | 1/1  | 0/1     |









|       |           |           |   |   |         |              |              |  |                                                                                                                                                                                                                                                                                                                                                                                                                                                                                                                                                                                                                                                                                                                                                      |                   |                                                                                                                                                                                                                                                                                                                                                                                                       |     |     |     |
|-------|-----------|-----------|---|---|---------|--------------|--------------|--|------------------------------------------------------------------------------------------------------------------------------------------------------------------------------------------------------------------------------------------------------------------------------------------------------------------------------------------------------------------------------------------------------------------------------------------------------------------------------------------------------------------------------------------------------------------------------------------------------------------------------------------------------------------------------------------------------------------------------------------------------|-------------------|-------------------------------------------------------------------------------------------------------------------------------------------------------------------------------------------------------------------------------------------------------------------------------------------------------------------------------------------------------------------------------------------------------|-----|-----|-----|
| chr19 | 17343337  | 17343337  | C | T | 310.09  | downstream   | GTPBP3       |  |                                                                                                                                                                                                                                                                                                                                                                                                                                                                                                                                                                                                                                                                                                                                                      |                   |                                                                                                                                                                                                                                                                                                                                                                                                       | 0/1 | 0/0 |     |
| chr19 | 18575154  | 18575154  | G | T | 3988.13 | UTR3         | UBA52        |  | XM_005260054.2:c.*4G>T.NM_001321017.1:c.*4G>T.XM_005260053.3:c.*4G>T.NM_003333.5:c.*4G>T.NM_001321022.2:c.*4G>T.NM_001033930.3:c.*4G>T.NM_001321019.2:c.*4G>T.NM_001321020.2:c.*4G>T.NM_001321018.2:c.*4G>T.NM_005260052.2:c.*4G>T.XM_006722871.2:c.*4G>T.XM_017027198.1:c.*4G>T.NM_001321021.1:c.*4G>T                                                                                                                                                                                                                                                                                                                                                                                                                                              |                   |                                                                                                                                                                                                                                                                                                                                                                                                       |     | 1/1 | 0/1 |
| chr19 | 20041710  | 20041710  | G | T | 1469.54 | downstream   | LOC105372309 |  |                                                                                                                                                                                                                                                                                                                                                                                                                                                                                                                                                                                                                                                                                                                                                      |                   |                                                                                                                                                                                                                                                                                                                                                                                                       | 1/1 | 0/1 |     |
| chr19 | 23559090  | 23559090  | A | G | 1896.12 | downstream   | LOC105372338 |  |                                                                                                                                                                                                                                                                                                                                                                                                                                                                                                                                                                                                                                                                                                                                                      |                   |                                                                                                                                                                                                                                                                                                                                                                                                       | 1/1 | 0/1 |     |
| chr19 | 37391576  | 37391576  | A | T | 613.48  | UTR3         | ZNF527       |  | XM_005259328.5:c.*1697A>T.XM_017027381.1:c.*1697A>T.NM_032453.2:c.*1697A>T.XM_005259329.4:c.*1697A>T.XM_017027380.1:c.*1697A>T                                                                                                                                                                                                                                                                                                                                                                                                                                                                                                                                                                                                                       |                   |                                                                                                                                                                                                                                                                                                                                                                                                       |     | 0/1 | 1/1 |
| chr19 | 37391580  | 37391580  | A | T | 640.16  | UTR3         | ZNF527       |  | XM_005259328.5:c.*1701A>T.XM_017027381.1:c.*1701A>T.NM_032453.2:c.*1701A>T.XM_005259329.4:c.*1701A>T.XM_017027380.1:c.*1701A>T                                                                                                                                                                                                                                                                                                                                                                                                                                                                                                                                                                                                                       |                   |                                                                                                                                                                                                                                                                                                                                                                                                       |     | 0/1 | 1/1 |
| chr19 | 37467346  | 37467346  | C | T | 454.13  | UTR5         | ZNF569       |  | XM_017026380.1:c.*53166G>A.XM_017026376.1:c.*22425G>A.XM_006723047.4:c.*12484G>A.XM_011526538.3:c.*12484G>A.XM_006723046.2:c.*12484G>A.XM_017026379.1:c.*53166G>A.NM_001330482.2:c.*53166G>A.NM_152484.3:c.*22425G>A                                                                                                                                                                                                                                                                                                                                                                                                                                                                                                                                 |                   |                                                                                                                                                                                                                                                                                                                                                                                                       |     | 0/1 | 0/0 |
| chr19 | 37695524  | 37695524  | C | A | 103.13  | downstream   | ZNF607       |  |                                                                                                                                                                                                                                                                                                                                                                                                                                                                                                                                                                                                                                                                                                                                                      |                   |                                                                                                                                                                                                                                                                                                                                                                                                       | 0/1 | 0/0 |     |
| chr19 | 40666153  | 40666153  | G | T | 324.91  | UTR3         | NUMBL        |  | NM_001289980.2:c.*1315C>A.NM_004756.5:c.*1315C>A.NM_001289979.2:c.*1315C>A                                                                                                                                                                                                                                                                                                                                                                                                                                                                                                                                                                                                                                                                           |                   |                                                                                                                                                                                                                                                                                                                                                                                                       |     | 1/1 | 0/0 |
| chr19 | 44612345  | 44612345  | C | T | 345.13  | upstream     | IGSF23       |  |                                                                                                                                                                                                                                                                                                                                                                                                                                                                                                                                                                                                                                                                                                                                                      |                   |                                                                                                                                                                                                                                                                                                                                                                                                       | 0/1 | 0/0 |     |
| chr19 | 49461720  | 49461720  | C | G | 2220.62 | exonic       | ALDH16A1     |  |                                                                                                                                                                                                                                                                                                                                                                                                                                                                                                                                                                                                                                                                                                                                                      | nonsynonymous_SNV | ALDH16A1:NM_001145396.2:exon6:c.C679G;p.L227V,ALDH16A1:NM_153329.4:exon6:c.C679G;p.L227V,ALDH16A1:NM_011526441.1:exon6:c.C592G;p.L198V,ALDH16A1:NM_011526442.1:exon6:c.C592G;p.L198V                                                                                                                                                                                                                  | 1/1 | 0/1 |     |
| chr19 | 49461874  | 49461874  | G | A | 2987.12 | intronic     | ALDH16A1     |  |                                                                                                                                                                                                                                                                                                                                                                                                                                                                                                                                                                                                                                                                                                                                                      |                   |                                                                                                                                                                                                                                                                                                                                                                                                       | 1/1 | 0/1 |     |
| chr19 | 49908960  | 49908960  | C | G | 3034.52 | exonic       | NUP62        |  |                                                                                                                                                                                                                                                                                                                                                                                                                                                                                                                                                                                                                                                                                                                                                      | nonsynonymous_SNV | NUP62:NM_001193357.2:exon2:c.G848C;p.S283T,NUP62:NM_012346.5:exon2:c.G848C;p.S283T,NUP62:NM_153718.4:exon2:c.G848C;p.S283T,NUP62:NM_016553.5:exon3:c.G848C;p.S283T,NUP62:NM_153719.4:exon3:c.G848C;p.S283T                                                                                                                                                                                            | 1/1 | 0/1 |     |
| chr19 | 51458965  | 51458965  | C | T | 307.13  | upstream     | SIGLEC8      |  |                                                                                                                                                                                                                                                                                                                                                                                                                                                                                                                                                                                                                                                                                                                                                      |                   |                                                                                                                                                                                                                                                                                                                                                                                                       | 0/1 | 0/0 |     |
| chr19 | 52154051  | 52154051  | T | A | 1298.17 | UTR3         | ZNF836       |  | XM_017026389.2:c.*821A>T.XM_011526558.3:c.*821A>T.XM_011526559.3:c.*821A>T                                                                                                                                                                                                                                                                                                                                                                                                                                                                                                                                                                                                                                                                           |                   |                                                                                                                                                                                                                                                                                                                                                                                                       |     | 1/1 | 0/1 |
| chr20 | 23376691  | 23376691  | A | G | 3438.06 | UTR3         | NAPB         |  | NM_001283018.1:c.*685T>C.NM_001283026.1:c.*685T>C.NM_001283020.1:c.*685T>C.XM_017028008.1:c.*685T>C.XM_011529313.1:c.*685T>C.NM_022080.3:c.*685T>C                                                                                                                                                                                                                                                                                                                                                                                                                                                                                                                                                                                                   |                   |                                                                                                                                                                                                                                                                                                                                                                                                       |     | 0/1 | 1/1 |
| chr20 | 25965815  | 25965815  | C | A | 495.13  | ncRNA_exonic | LINC01733    |  |                                                                                                                                                                                                                                                                                                                                                                                                                                                                                                                                                                                                                                                                                                                                                      |                   |                                                                                                                                                                                                                                                                                                                                                                                                       | 0/1 | 0/0 |     |
| chr20 | 32857585  | 32857585  | A | T | 1273.14 | UTR5         | EFCAB8       |  | XM_024451885.1:c.*6208A>T.XM_024451882.1:c.*6208A>T.XM_024451883.1:c.*6208A>T                                                                                                                                                                                                                                                                                                                                                                                                                                                                                                                                                                                                                                                                        |                   |                                                                                                                                                                                                                                                                                                                                                                                                       |     | 0/1 | 1/1 |
| chr20 | 33704999  | 33704999  | T | G | 2075.36 | UTR3         | PXMP4        |  | NM_007238.5:c.*270A>C.NM_183397.3:c.*2931A>C                                                                                                                                                                                                                                                                                                                                                                                                                                                                                                                                                                                                                                                                                                         |                   |                                                                                                                                                                                                                                                                                                                                                                                                       |     | 1/1 | 0/1 |
| chr20 | 45704960  | 45704960  | C | A | 314.13  | exonic       | WFDC10B      |  |                                                                                                                                                                                                                                                                                                                                                                                                                                                                                                                                                                                                                                                                                                                                                      | nonsynonymous_SNV | WFDC10B:NM_172131.2:exon1:c.G32T;p.S11I                                                                                                                                                                                                                                                                                                                                                               | 0/1 | 0/0 |     |
| chr21 | 9995528   | 9995528   | A | C | 511.16  | downstream   | LOC105372733 |  |                                                                                                                                                                                                                                                                                                                                                                                                                                                                                                                                                                                                                                                                                                                                                      |                   |                                                                                                                                                                                                                                                                                                                                                                                                       | 0/1 | 0/0 |     |
| chr21 | 10524654  | 10524654  | C | A | 4442.16 | UTR5         | TPE          |  | NM_001290224.2:c.*36506C>A.NM_199260.4:c.*14070C>A.NM_199259.4:c.*14070C>A.NM_199261.4:c.*14070C>A                                                                                                                                                                                                                                                                                                                                                                                                                                                                                                                                                                                                                                                   |                   |                                                                                                                                                                                                                                                                                                                                                                                                       |     | 1/1 | 0/1 |
| chr21 | 23876352  | 23876352  | G | C | 251.13  | ncRNA_exonic | LOC105372750 |  |                                                                                                                                                                                                                                                                                                                                                                                                                                                                                                                                                                                                                                                                                                                                                      |                   |                                                                                                                                                                                                                                                                                                                                                                                                       | 0/1 | 0/0 |     |
| chr21 | 29175362  | 29175362  | G | C | 2724.42 | UTR3         | MAP3K7CL     |  | NM_001286634.2:c.*470G>C.NM_001286618.2:c.*470G>C.NM_001286617.2:c.*470G>C.NM_01286622.2:c.*470G>C.NM_001371369.1:c.*470G>C.NM_001371374.1:c.*470G>C.NM_020152.4:c.*470G>C.NM_001286619.1:c.*470G>C.NM_001371376.1:c.*470G>C.NM_001371370.1:c.*470G>C.NM_001371373.1:c.*470G>C.NM_001286620.2:c.*470G>C.NM_001371372.1:c.*470G>C.NM_001371371.1:c.*470G>C.NM_001286624.2:c.*470G>C                                                                                                                                                                                                                                                                                                                                                                   |                   |                                                                                                                                                                                                                                                                                                                                                                                                       |     | 1/1 | 0/1 |
| chr22 | 36288308  | 36288308  | T | C | 3726.14 | exonic       | MYH9         |  |                                                                                                                                                                                                                                                                                                                                                                                                                                                                                                                                                                                                                                                                                                                                                      | nonsynonymous_SNV | MYH9:NM_002473.6:exon34:c.A4876G;p.L1626V                                                                                                                                                                                                                                                                                                                                                             | 1/1 | 0/1 |     |
| chr22 | 38686944  | 38686944  | C | G | 2542.13 | UTR3         | JOSD1        |  | XM_005261878.3:c.*958G>C.NM_001360236.2:c.*958G>C.NM_014876.7:c.*958G>C.NM_001360235.2:c.*958G>C                                                                                                                                                                                                                                                                                                                                                                                                                                                                                                                                                                                                                                                     |                   |                                                                                                                                                                                                                                                                                                                                                                                                       |     | 1/1 | 0/1 |
| chr22 | 39320613  | 39320613  | G | A | 291.13  | upstream     | RPL3         |  |                                                                                                                                                                                                                                                                                                                                                                                                                                                                                                                                                                                                                                                                                                                                                      |                   |                                                                                                                                                                                                                                                                                                                                                                                                       | 0/1 | 0/0 |     |
| chr22 | 39489072  | 39489072  | T | G | 30.69   | UTR3         | MGAT3        |  | NM_002409.5:c.*123T>G.NM_001098270.1:c.*123T>G                                                                                                                                                                                                                                                                                                                                                                                                                                                                                                                                                                                                                                                                                                       |                   |                                                                                                                                                                                                                                                                                                                                                                                                       |     | 0/1 | 0/0 |
| chr22 | 43835152  | 43835152  | C | G | 1305.13 | UTR3         | SULT4A1      |  | XM_011530120.3:c.*876G>C                                                                                                                                                                                                                                                                                                                                                                                                                                                                                                                                                                                                                                                                                                                             |                   |                                                                                                                                                                                                                                                                                                                                                                                                       |     | 1/1 | 0/1 |
| chr22 | 50206552  | 50206552  | C | T | 415.13  | ncRNA_exonic | LOC105373095 |  |                                                                                                                                                                                                                                                                                                                                                                                                                                                                                                                                                                                                                                                                                                                                                      |                   |                                                                                                                                                                                                                                                                                                                                                                                                       | 0/1 | 0/0 |     |
| chrX  | 24213698  | 24213698  | T | A | 1000.95 | UTR3         | ZFX          |  | NM_001330327.2:c.*2322T>A.XM_017029799.1:c.*2322T>A.XM_005274592.3:c.*2322T>A.XM_017029792.1:c.*2322T>A.XM_011545581.2:c.*2322T>A.XM_017029791.2:c.*2322T>A.XM_017029790.1:c.*2322T>A.XM_006724513.3:c.*2322T>A.XM_017029800.2:c.*2322T>A.XM_017029798.2:c.*2322T>A.XM_005274591.4:c.*2322T>A.XM_017029797.2:c.*2322T>A.NM_001178086.1:c.*2322T>A.NM_001178084.2:c.*2322T>A.NM_001178095.2:c.*3500T>A.NM_003410.4:c.*2322T>A.NM_001178085.1:c.*2322T>A.XM_017029794.1:c.*2322T>A.XM_017029789.1:c.*2322T>A.XM_011545579.1:c.*2322T>A.XM_017029788.1:c.*2322T>A.XM_024452440.1:c.*2322T>A.XM_017029795.1:c.*2322T>A.XM_017029793.1:c.*2322T>A.XM_017029796.1:c.*2322T>A.XM_011545583.3:c.*2322T>A.XM_005274594.5:c.*2322T>A.XM_017029801.1:c.*2322T>A |                   |                                                                                                                                                                                                                                                                                                                                                                                                       |     | 0/1 | 1/1 |
| chrX  | 37456502  | 37456502  | G | A | 469.16  | UTR3         | PRRG1        |  | NM_001173490.1:c.*2881G>A.NM_001173489.1:c.*2881G>A.NM_001142395.2:c.*2881G>A.NM_000950.3:c.*2881G>A                                                                                                                                                                                                                                                                                                                                                                                                                                                                                                                                                                                                                                                 |                   |                                                                                                                                                                                                                                                                                                                                                                                                       |     | 1/1 | 0/0 |
| chrX  | 47206074  | 47206074  | C | G | 1134.13 | exonic       | UBA1         |  |                                                                                                                                                                                                                                                                                                                                                                                                                                                                                                                                                                                                                                                                                                                                                      | nonsynonymous_SNV | UBA1:NM_003334.4:exon15:c.C1702G;p.L568V,UBA1:NM_153280.3:exon15:c.C1702G;p.L568V,UBA1:NM_017029777.1:exon15:c.C1855G;p.L619V,UBA1:NM_017029779.2:exon15:c.C1720G;p.L574V,UBA1:NM_017029780.1:exon15:c.C1702G;p.L568V,UBA1:NM_017029781.1:exon15:c.C1702G;p.L568V,UBA1:NM_005272649.1:exon16:c.C1720G;p.L574V,UBA1:NM_011543954.2:exon16:c.C1744G;p.L562V,UBA1:NM_017029778.2:exon16:c.C1786G;p.L566V | 1/1 | 0/1 |     |
| chrX  | 73005386  | 73005386  | T | C | 1620.13 | UTR3         | PABPC1L2B    |  | NM_001042506.2:c.*1141T>C                                                                                                                                                                                                                                                                                                                                                                                                                                                                                                                                                                                                                                                                                                                            |                   |                                                                                                                                                                                                                                                                                                                                                                                                       |     | 1/1 | 0/1 |
| chrX  | 73005391  | 73005391  | T | G | 1765.13 | UTR3         | PABPC1L2B    |  | NM_001042506.2:c.*1146T>G                                                                                                                                                                                                                                                                                                                                                                                                                                                                                                                                                                                                                                                                                                                            |                   |                                                                                                                                                                                                                                                                                                                                                                                                       |     | 1/1 | 0/1 |
| chrX  | 73005397  | 73005397  | C | A | 1723.13 | UTR3         | PABPC1L2B    |  | NM_001042506.2:c.*1152C>A                                                                                                                                                                                                                                                                                                                                                                                                                                                                                                                                                                                                                                                                                                                            |                   |                                                                                                                                                                                                                                                                                                                                                                                                       |     | 1/1 | 0/1 |
| chrX  | 78127739  | 78127739  | G | C | 1190.55 | UTR3         | PGK1         |  | NM_000291.4:c.*1909G>C                                                                                                                                                                                                                                                                                                                                                                                                                                                                                                                                                                                                                                                                                                                               |                   |                                                                                                                                                                                                                                                                                                                                                                                                       |     | 1/1 | 0/1 |
| chrX  | 78130251  | 78130251  | C | T | 1500.14 | UTR3         | TAF9B        |  | NM_015975.5:c.*1359G>A                                                                                                                                                                                                                                                                                                                                                                                                                                                                                                                                                                                                                                                                                                                               |                   |                                                                                                                                                                                                                                                                                                                                                                                                       |     | 1/1 | 0/1 |
| chrX  | 81297730  | 81297730  | C | T | 1377.13 | UTR3         | SH3BGRL      |  | XM_011531014.1:c.*503C>T.NM_003022.3:c.*503C>T.XM_011531013.1:c.*503C>T                                                                                                                                                                                                                                                                                                                                                                                                                                                                                                                                                                                                                                                                              |                   |                                                                                                                                                                                                                                                                                                                                                                                                       |     | 1/1 | 0/1 |
| chrX  | 119469881 | 119469881 | T | G | 1291.13 | exonic       | SLC25A5      |  |                                                                                                                                                                                                                                                                                                                                                                                                                                                                                                                                                                                                                                                                                                                                                      | nonsynonymous_SNV | SLC25A5:NM_001152.5:exon2:c.T332G;p.L111R                                                                                                                                                                                                                                                                                                                                                             | 1/1 | 0/1 |     |

**Supplementary Table S3. Teratoma formation assay**

| <b>Cell Types<br/>(cell number)</b> | <b>Animal model<br/>(transplantation site, period)</b>                 | <b>Number</b> | <b>Teratoma<br/>forming<br/>percentage</b> |
|-------------------------------------|------------------------------------------------------------------------|---------------|--------------------------------------------|
| hPSC ( $1 \times 10^5$ )            | SCID Beige mice<br>(cervical subcutaneous or intramuscular, 4-6 weeks) | 20            | 100%                                       |
| EnSC ( $1 \times 10^7$ )            | SCID Beige mice<br>(cervical subcutaneous or intramuscular, 6 months)  | 20            | 0                                          |
| E-islet (1000 IEQ)                  | SCID Beige mice<br>(kidney capsule, 4-6 months)                        | 20            | 0                                          |
|                                     | NCG-hIL15 humanized mice<br>(kidney capsule, 4 weeks)                  | 6             | 0                                          |
| E-islet (6000 IEQ)                  | Monkey<br>(intrahepatic, 2 months)                                     | 1             | 0                                          |
| E-islet (30000 IEQ)                 | Monkey<br>(intrahepatic, 2 months)                                     | 1             | 0                                          |

## Supplementary Table S4. Key laboratory values before and after transplantation

**Table S4: Key Laboratory Values before and after Transplantation**

| Parameter                                                                    | Baseline | 2W   | 4W   | 8W   | 12W  | 16W  | 24W  | 52W  | 81W  | 116W | Normal Range |
|------------------------------------------------------------------------------|----------|------|------|------|------|------|------|------|------|------|--------------|
| White-cell count (10 <sup>9</sup> /Liter)                                    | 5.2      | 4.1  | 5.1  | 5.3  | 4.4  | 5.2  | 5.5  | 4.6  | 3.9  | 5.6  | 3.5-9.5      |
| Hemoglobin (g/Liter)                                                         | 143      | 140  | 136  | 144  | 134  | 131  | 131  | 125  | 116  | 130  | 130-175      |
| Platelet count (10 <sup>9</sup> /Liter)                                      | 177      | 194  | 155  | 171  | 151  | 194  | 243  | 192  | 202  | 143  | 125-350      |
| Total Bilirubin (umol/Liter)                                                 | 13.4     | 8.3  | 6.6  | 8.2  | 14.1 | 11.1 | 11.2 | 15.2 | 12.2 | 8.0  | 3.4-17.1     |
| Directed Bilirubin (umol/Liter)                                              | 2.7      | 0    | 1.5  | 1.7  | 2.1  | 1.8  | 0    | 3.4  | 2.6  | 3.5  | 0-3.4        |
| Albumin (g/Liter)                                                            | 38       | 39.1 | 39.9 | 40.7 | 37.8 | 41.7 | 45.9 | 41.8 | 34.1 | 40.9 | 40-55        |
| Aspartate aminotransferase (U/Liter)                                         | 15       | 20   | 17   | 17   | 14   | 26   | 27   | 23   | 21   | 17   | 15-40        |
| Alanine aminotransferase (U/Liter)                                           | 10       | 30   | 13   | 11   | 12   | 23   | 21   | 19   | 17   | 23   | 9-50         |
| Creatinine (umol/Liter)                                                      | 87       | 84   | 90   | 77   | 77   | 72   | 60   | 87   | 82   | 103  | 57-111       |
| estimated GFR (CKD-EPI calculation, mL/min per 1.73 m <sup>2</sup> )(ml/min) | 84       | 82   | 80   | 94   | 94   | 97   | -    | 83   | 89   | 72   | >60          |
| D-dimer (ug/ml)                                                              | 0.56     | -    | -    | 0.64 | 1.35 | 0.29 | 0.5  | 0.99 | -    | -    | 0-1          |
| CD4+ cell count (%)                                                          | 26       | 29.7 | 27.8 | 28   | 31.9 | 35.8 | -    | 21.3 | 28.7 | -    | 25.8-41.6    |
| CD8+ cell count (%)                                                          | 41       | 37.3 | 38.1 | 38.3 | 39.9 | 39   | -    | 39.6 | 40.6 | -    | 18.1-29.6    |
| CD4/CD8 ratio                                                                | 0.63     | 0.8  | 0.73 | 0.73 | 0.8  | 0.92 | -    | 0.43 | 0.71 | -    | 1.57-2.93    |
| Insulin specific antibodies*                                                 | Neg      | -    | -    | -    | Neg  | Neg  | -    | -    | -    | -    | Neg          |
| FK506 concentration (ng/ml)                                                  | 3.6      | 4.5  | 3.7  | 3.9  | 3    | 5.9  | -    | 5.9  | 4.7  | 5.2  | 5-10         |

\* Included IA-2A, Zn-8, IAA, GADA, and ICA-40KDA, ICA-64KDA.

## Supplementary Table S5. Primary follow-up objectives

**Table S5: Primary follow-up objectives**

| Parameter                                    | Baseline | 2W      | 4W      | 8W      | 12W    | 16W     | 24W    | 36W     | 52W     | 81W     | 105W    | Normal Range |
|----------------------------------------------|----------|---------|---------|---------|--------|---------|--------|---------|---------|---------|---------|--------------|
| Mixed-meal Tolerance Test                    |          |         |         |         |        |         |        |         |         |         |         |              |
| Fasting serum glucose concentration (mmol/L) | 3.9      | 13      | 6.8     | 5.4     | 6.4    | 6       | 5.6    | 4.75    | 3.5     | 5.2     | 5.0     | 3.9-6.1      |
| 15min serum glucose concentration (mmol/L)   | 4.9      | 7.2     | 5.2     | 5.7     | 6.6    | 5.9     | 6.4    | 5.21    | 4.1     | 4.8     | 5.4     | 3.9-6.1      |
| 30min serum glucose concentration (mmol/L)   | 5.9      | 19.5    | 6.3     | 7.7     | 8.7    | 5.9     | 6.8    | 5.64    | 4.3     | 4.8     | 5.1     | <10.5        |
| 60min serum glucose concentration (mmol/L)   | 14.3     | 8.3     | 13.1    | 17.1    | 16.7   | 9.4     | 9.8    | 5.96    | 4.9     | 9.0     | 7.3     | <10          |
| 120min serum glucose concentration (mmol/L)  | 21.3     | 6.7     | 15.3    | 21.6    | 22.2   | 11.8    | 5.2    | 7.51    | 7.3     | 6.2     | 9.1     | <7.8         |
| 180min serum glucose concentration (mmol/L)  | 19       | 5.3     | 12      | 17.8    | 16.8   | 9.5     | 6.6    | 6.61    | 8.3     | 5.4     | 5.8     | <6.9         |
| 240min serum glucose concentration (mmol/L)  | -        | -       | -       | 12.9    | 12.5   | 8.1     | 5.5    | 4.75    | 5.8     | 3.5     | 5.1     | 3.9-6.1      |
| AUC-180min of Glucose                        | 2727     | 1579    | 2138    | 2899    | 2930   | 1682    | 1242   | 1158    | 1092    | 1161    | 1277    | -            |
| Fold change in the AUC from baseline         | 0        | -0.4210 | -0.2160 | 0.0631  | 0.0744 | -0.3832 | -0.545 | -0.5754 | -0.5996 | -0.5743 | -0.5317 | -            |
| Fasting serum C-peptide (nmol/L)             | 0.23     | 0.43    | 0.49    | 0.47    | 0.66   | 0.7     | 1.09   | 0.29    | 0.53    | 0.68    | 0.51    | 0.37-1.47    |
| 15min serum C-peptide (nmol/L)               | 0.33     | 0.56    | 0.55    | 0.41    | 0.61   | 0.71    | 0.96   | 0.24    | 0.52    | 0.59    | 0.60    | 0.37-1.47    |
| 30min serum C-peptide (nmol/L)               | 0.35     | 0.5     | 0.61    | 0.54    | 0.77   | 0.85    | 0.97   | 0.45    | 0.8     | 0.62    | 0.60    | -            |
| 60min serum C-peptide (nmol/L)               | 0.74     | 0.67    | 1.23    | 0.8     | 1.13   | 1.29    | 2.26   | 0.65    | 0.93    | 3.3     | 1.29    | -            |
| 120min serum C-peptide (nmol/L)              | 2.15     | 3.33    | 1.71    | 1.91    | 2.2    | 2.7     | 1.56   | 1.82    | 2.88    | 3.56    | 3.34    | -            |
| 180min serum C-peptide (nmol/L)              | 2.33     | 1.99    | 2.25    | 1.9     | 2.71   | 2.76    | 1.73   | 1.43    | 5.16    | 1.96    | 2.84    | -            |
| 240min serum C-peptide (nmol/L)              | -        | -       | -       | 1.8     | 2.19   | 2.35    | 1.07   | 1.12    | 3.72    | 1.24    | 2.41    | 0.37-1.47    |
| AUC-180min of C-peptide                      | 246.8    | 312.5   | 251.1   | 229.4   | 295.6  | 337.9   | 291.6  | 197.3   | 399.2   | 449.7   | 369.3   | -            |
| Fold change in the AUC from baseline         | 0        | 0.2662  | 0.0174  | -0.0705 | 0.1977 | 0.3691  | 0.1815 | -0.2006 | 0.6175  | 0.8266  | 0.4963  | -            |
| Fasting serum insulin (pmol/L)               | 16.84    | 23.6    | 16.71   | 16.64   | 52.96  | 48.62   | 94.33  | 32.53   | 41.73   | 83.79   | 12.36   | 18.11-173.43 |
| 15min serum insulin (pmol/L)                 | 34.59    | 58.43   | 39.95   | 24.16   | 40.64  | 520.3   | 128.9  | -       | 54.58   | 61.0    | 37.56   | -            |
| 30min serum insulin (pmol/L)                 | 29.74    | 36.04   | 46.61   | 60.86   | 72.63  | 38.56   | 114.4  | 163.07  | 138.7   | 56.32   | 27.05   | -            |
| 60min serum insulin (pmol/L)                 | 84.79    | 62.65   | 205.7   | 112     | 147.3  | 141.2   | 573.7  | 173.45  | 161.5   | 1232.0  | 215.9   | -            |
| 120min serum insulin (pmol/L)                | 241.4    | 663.9   | 206.1   | 244.2   | 296    | 381     | 171.4  | 519.53  | 721.5   | 644.3   | 473.8   | -            |
| 180min serum insulin (pmol/L)                | 233.5    | 138.5   | 245.8   | 204.7   | 406.1  | 441     | 298.4  | 416.71  | 1383    | 277.3   | 212.4   | -            |
| 240min serum insulin (pmol/L)                | -        | -       | -       | 132     | 210    | 262.8   | 118    | -       | 469.1   | 95.1    | 189.2   | 18.11-173.43 |
| AUC-180min of Insulin                        | 26619    | 48673   | 30770   | 27690   | 39212  | 51481   | 50267  | 56858   | 96300   | 105363  | 45512   | -            |
| Fold change in the AUC from baseline         | 0        | 0.8285  | 0.1559  | 0.0402  | 0.4731 | 0.9340  | 0.8884 | 1.13599 | 2.6177  | 2.9836  | 0.7097  | -            |

**Supplementary Table S6. Quality control release criteria of EnSCs and E-islets**

**Quality control release criteria of EnSCs**

| Test                             | Item or method             | Release Criteria                                                                                                                     |
|----------------------------------|----------------------------|--------------------------------------------------------------------------------------------------------------------------------------|
| Cell morphology                  | Phase contrast observation | Typical epithelial morphology with clear cell boundary. Dense clones consist of irregular cells with diameter of 3-5 $\mu\text{m}$ . |
| Cell characterization and purity | Flow cytometry             | FOXA1+ $\geq 90\%$                                                                                                                   |
| Genomic stability                | Karyotype test             | Intact karyotype                                                                                                                     |
|                                  | Whole genome sequencing    | Devoid of known cancer-related mutations and the lowest overall mutational burden compared to patient PBMC.                          |
| Cell viability                   | Flow cytometry             | Live cell proportion $>90\%$ before frozen and $>60\%$ after thaw.                                                                   |
| Pathogen test                    | Mycoplasma                 | Undetectable                                                                                                                         |
|                                  | Sterility                  | Undetectable                                                                                                                         |
|                                  | Virus                      | Negative                                                                                                                             |
| Safety                           | Teratoma formation test    | No teratoma found.                                                                                                                   |

**Quality control release criteria of E-islets**

| Stage    | Test                             | Method                     | Release Criteria                                                                                        |
|----------|----------------------------------|----------------------------|---------------------------------------------------------------------------------------------------------|
| PP stage | Cell morphology                  | Phase contrast observation | Typical epithelial morphology with unclear cell boundary. Cells with diameter of $\leq 3 \mu\text{m}$ . |
|          | Cell characterization and purity | Flow cytometry             | PDX1+ $\geq 60\%$                                                                                       |
|          | Cell viability                   | Flow cytometry             | Live cell proportion $>90\%$                                                                            |
|          | Pathogen test                    | Mycoplasma                 | Undetectable                                                                                            |
|          |                                  | Sterility                  | Undetectable                                                                                            |
|          |                                  | Virus                      | Negative                                                                                                |
|          |                                  | Endotoxin                  | $\leq 1 \text{ EU/mL}$                                                                                  |
| EP stage | Cell characterization and purity | Flow cytometry             | PDX1+/NKX6-1+ $\geq 60\%$                                                                               |
|          | Cell viability                   | Flow cytometry             | Live cell proportion $>90\%$                                                                            |
|          | Pathogen test                    | Mycoplasma                 | Undetectable                                                                                            |
|          |                                  | Sterility                  | Undetectable                                                                                            |
|          |                                  | Virus                      | Negative                                                                                                |
|          |                                  | Endotoxin                  | $\leq 1 \text{ EU/mL}$                                                                                  |



|         |                            |                                                               |                                                                                                                                                                                                                                                                                               |
|---------|----------------------------|---------------------------------------------------------------|-----------------------------------------------------------------------------------------------------------------------------------------------------------------------------------------------------------------------------------------------------------------------------------------------|
| E-islet | Morphology                 | Phase contrast observation                                    | Dense spherical cell mass with unclear cell boundary. Average diameter at 150 $\mu\text{m}$ .                                                                                                                                                                                                 |
|         | Cell proportion and purity | Flow cytometry                                                | ① Pancreatic lineage: PDX1+ $\geq$ 85%<br>② Endocrine lineage: CHGA+ $\geq$ 60%<br>③ Endocrine cell proportion:<br>$\beta$ cell (C-peptide+) $\geq$ 40%;<br>$\alpha$ cell (Glucagon+) $\geq$ 20%;<br>$\delta$ cell (Somatostatin+) $\leq$ 15%<br>④ Untargeted hepatic lineage: AFP+ $\leq$ 2% |
|         | Cell viability             | Flow cytometry                                                | Live cell proportion >90%                                                                                                                                                                                                                                                                     |
|         | In vitro functionality     | Static glucose stimulated insulin (C-peptide) secretion assay | Positive, $\geq$ 1.5 folds change                                                                                                                                                                                                                                                             |
|         | Pathogen test              | Mycoplasma                                                    | Undetectable                                                                                                                                                                                                                                                                                  |
|         |                            | Sterility                                                     | Undetectable                                                                                                                                                                                                                                                                                  |
|         |                            | Virus                                                         | Negative                                                                                                                                                                                                                                                                                      |
|         |                            | Endotoxin                                                     | $\leq$ 1 EU/mL                                                                                                                                                                                                                                                                                |

**Supplementary Table S7. Primer list**

| <b>Gene</b>   | <b>Sequences (Forward, 5' to 3')</b> | <b>Sequences (Reverse, 5' to 3')</b> |
|---------------|--------------------------------------|--------------------------------------|
| <i>PDX1</i>   | GAACGCCACACAGTGCCAAATC               | AACGCGCATGGGTCCTTGTAAG               |
| <i>NKX6-1</i> | ACACACTGCTGTGCAACTAAAG               | ACTTCTAGTCAGTGTAACCTCAGATT           |
| <i>INS</i>    | TTTGTGAACCAACACCTGTGCGG              | GCGGGTCTTGGGTGTGTAGAAGAA             |
| <i>GCG</i>    | TTCCCAGAAGAGGTCGCCATTGTT             | CAACCAGTTTATAAAGTCCCTGGCGG           |
| <i>SST</i>    | GAGAATGATGCCCTGGAACCTGAAGA           | ATTCTTGCAGCCAGCTTTGCGT               |
| <i>TBP</i>    | TTGCTGAGAAGAGTGTGCTGGAGATG           | CGTAAGGTGGCAGGCTGTTGTT               |

**Supplementary Table S8. Antibody list**

| <b>Antibodies</b>              | <b>Source</b>             | <b>Catalog No.</b> |
|--------------------------------|---------------------------|--------------------|
| Anti-human Alpha-1-fetoprotein | Agilent                   | Cat# A0008         |
| Anti-human Albumin             | Bethyl                    | Cat# A80-129       |
| Anti-mouse CD45                | Biologend                 | Cat# 103106        |
| Anti-human CD45                | Biologend                 | Cat# 304010        |
| Anti-Chromogranin A            | Abcam                     | Cat# AB68271       |
| Anti-C-peptide                 | Cell Signaling Technology | Cat# 4593S         |
| Anti-Glucagon                  | Sigma-Aldrich             | Cat# G2654         |
| Anti-FOXA1                     | Santa Cruz Biotechnology  | Cat# sc-101058     |
| Anti-NKX6-1                    | DSHB                      | Cat# F55A12        |
| Anti-PDX1                      | R & D Systems             | Cat# AF2419        |
| Anti-Somatostatin              | Santa Cruz Biotechnology  | Cat# sc-74556      |
| Anti-SOX17                     | R & D Systems             | Cat# BAF1924       |
| Streptavidin APC               | BD                        | Cat# 554067        |

|                                           |                             |                  |
|-------------------------------------------|-----------------------------|------------------|
| Alexa Fluor 488 Goat Anti-Mouse IgG2a     | Jackson ImmunoResearch Labs | Cat# 115-545-206 |
| Alexa Fluor 647 Donkey Anti-Mouse IgG     | Jackson ImmunoResearch Labs | Cat# 715-605-151 |
| Alexa Fluor 488 Donkey Anti-Rabbit IgG    | Jackson ImmunoResearch Labs | Cat# 711-545-152 |
| Alexa Fluor 647 Donkey Anti-Goat IgG      | Thermo Fisher Scientific    | Cat# A-21447     |
| Alexa Fluor 488 Rabbit Anti-Mouse IgG     | Jackson ImmunoResearch Labs | Cat# 315-545-003 |
| Normal Goat IgG Biotinylated Control      | R & D Systems               | Cat# BAF108      |
| Normal Mouse IgG2a                        | Santa Cruz Biotechnology    | Cat# sc-3878     |
| Normal Goat IgG Control                   | R & D Systems               | Cat# AB-108-C    |
| Rabbit IgG Isotype Control                | Cell Signaling Technology   | Cat# 3900s       |
| Purified Mouse IgG1 Kappa Isotype Control | BD                          | Cat# 557273      |
| Calcein Blue AM Viability Dye             | Thermo Fisher Scientific    | Cat# 650855      |
